# Supplementary material for: Structure–activity relationship of novel macrocyclic biased apelin receptor agonists
Source: Royal Society of Chemistry journal article supplement (doi:10.1039/c6ob02247b), 2016-11-29

## Electronic Supplementary Information (ESI)

Molecular formula, purity, calculated mass, m/3z and m/2z measured of macrocyclic apelin analogs.

### Structure-activity relationship of novel macrocyclic biased apelin receptor agonists

Alexandre Murza,<sup>a,c,‡</sup> Xavier Sainsily,<sup>a,c,‡</sup> Jérôme Côté,<sup>a,c</sup> Laurent Bruneau-Cossette,<sup>a,c</sup> Élie Besserer-Offroy,<sup>a,c</sup> Jean-Michel Longpré,<sup>a,c</sup> Richard Leduc,<sup>a,c</sup> Robert Dumaine,<sup>a</sup> Olivier Lesur,<sup>b,c</sup> Mannix Auger-Messier,<sup>b</sup> Philippe Sarret<sup>a,c,§</sup> and Éric Marsault<sup>a,c,§,\*</sup>

<sup>a</sup> Département de Pharmacologie et Physiologie, Faculté de Médecine et des Sciences de la Santé, Université de Sherbrooke, Sherbrooke (QC), J1H 5N4, Canada.

<sup>b</sup> Département de Médecine, Faculté de Médecine et des Sciences de la Santé, Université de Sherbrooke, Sherbrooke (QC), J1H 5N4, Canada.

<sup>c</sup> Institut de Pharmacologie de Sherbrooke, Université de Sherbrooke, Sherbrooke (QC), J1H 5N4, Canada.

<sup>‡</sup> These authors contributed equally to this work.

<sup>§</sup> These authors contributed equally to directing this study.

#### AUTHOR INFORMATION

##### Corresponding Author

\* Prof. Éric Marsault

Phone: +1 819.821.8000 ext 72433

Fax: +1 819.564.5400

Email: [eric.marsault@usherbrooke.ca](mailto:eric.marsault@usherbrooke.ca)

| N°    | Sequence <sup>a</sup>                                                      | Mol. formula                                                       | Purity % | Calculated mass | m/2z measured <sup>b</sup> | m/3z or m/z measured <sup>b</sup> |
|-------|----------------------------------------------------------------------------|--------------------------------------------------------------------|----------|-----------------|----------------------------|-----------------------------------|
| Ape13 | Pyr-R-P-R-L-S-H-K-G-P-M-P-F                                                | C <sub>69</sub> H <sub>108</sub> N <sub>22</sub> O <sub>16</sub> S | 100      | 1532.8035       | 767.6                      | 512.0                             |
| 1     | R-P-R-L-S- <b>AllylGly</b> -K-G-P- <b>AllylGly</b> -F                      | C <sub>56</sub> H <sub>90</sub> N <sub>18</sub> O <sub>13</sub>    | 100      | 1223.4490       | 613.2                      | 409.5                             |
| 2     | R-P-R-L-S- <b>AllylGly</b> -K-G-P- <b>AllylGly</b> -Tyr(OBn)               | C <sub>63</sub> H <sub>96</sub> N <sub>18</sub> O <sub>14</sub>    | 95.0     | 1329.5730       | 666.4                      | 444.9                             |
| 3     | R-P-R-L-S- <b>AllylGly</b> -K-G-P- <b>AllylGly</b> -A                      | C <sub>50</sub> H <sub>86</sub> N <sub>18</sub> O <sub>13</sub>    | 100      | 1147.3510       | 575.2                      | 384.0                             |
| 4     | R-P-R-L-S- <b>AllylGly</b> -K-G-P- <b>AllylGly</b>                         | C <sub>47</sub> H <sub>81</sub> N <sub>17</sub> O <sub>12</sub>    | 100      | 1076.2720       | 539.7                      | 360.3                             |
| 5     | R-P-R-L-S- <b>AllylGly</b> -K-G-Tyr(OBn)-P- <b>AllylGly</b>                | C <sub>63</sub> H <sub>96</sub> N <sub>18</sub> O <sub>14</sub>    | 99.6     | 1329.5730       | 665.8                      | 444.2                             |
| 6     | R-P-R-L-S- <b>AllylGly</b> -K-Tyr(OBn)-G-P- <b>AllylGly</b>                | C <sub>63</sub> H <sub>96</sub> N <sub>18</sub> O <sub>14</sub>    | 100      | 1329.5730       | 665.7                      | 444.2                             |
| 7     | R-P-R-L-S- <b>AllylGly</b> -K-G-P- <b>AllylGly</b> -P-Tyr(OBn)             | C <sub>68</sub> H <sub>103</sub> N <sub>19</sub> O <sub>15</sub>   | 100      | 1426.6900       | 714.1                      | 476.5                             |
| 8     | R-P-R-L-S- <b>AllylGly</b> -K-G-P- <b>AllylGly</b> -βAla-Tyr(OBn)          | C <sub>66</sub> H <sub>101</sub> N <sub>19</sub> O <sub>15</sub>   | 100      | 1400.6520       | 701.1                      | 467.8                             |
| 9     | R-P-R-L-S- <b>AllylGly</b> -K-G-P- <b>AllylGly</b> -γAbu-Tyr(OBn)          | C <sub>67</sub> H <sub>103</sub> N <sub>19</sub> O <sub>15</sub>   | 100      | 1414.6790       | 708.8                      | 473.1                             |
| 10    | R-P-R-L-S- <b>AllylGly</b> -K-G-P- <b>AllylGly</b> -A-Tyr(OBn)             | C <sub>66</sub> H <sub>101</sub> N <sub>19</sub> O <sub>15</sub>   | 100      | 1400.6520       | 701.2                      | 467.8                             |
| 11    | R-P-R-L-S- <b>AllylGly</b> -[8-aminocaprylic]- <b>AllylGly</b> -P-Tyr(OBn) | C <sub>63</sub> H <sub>96</sub> N <sub>16</sub> O <sub>13</sub>    | 99.3     | 1285.5600       | 643.8                      | 459.6                             |
| 12    | R-P-R-L-S- <b>AllylGly</b> -βAla-βAla- <b>AllylGly</b> -Tyr(OBn)           | C <sub>56</sub> H <sub>84</sub> N <sub>16</sub> O <sub>13</sub>    | 97.5     | 1189.3870       | 596.2                      | 460.0                             |
| 13    | R-P-R-L-S- <b>AllylGly</b> -βAla-βAla- <b>AllylGly</b> -P-Tyr(OBn)         | C <sub>61</sub> H <sub>91</sub> N <sub>17</sub> O <sub>14</sub>    | 100      | 1286.5040       | 644.7                      | 430.3                             |
| 14    | R-P-R-L-S- <b>AllylGly</b> -Nle-G-P- <b>AllylGly</b> -Tyr(OBn)             | C <sub>63</sub> H <sub>95</sub> N <sub>17</sub> O <sub>14</sub>    | 99.5     | 1314.5580       | 658.7                      | 439.7                             |
| 15    | K-P-K-L-S- <b>AllylGly</b> -K-G-P- <b>AllylGly</b> -Tyr(OBn)               | C <sub>63</sub> H <sub>96</sub> N <sub>14</sub> O <sub>14</sub>    | 100      | 1273.5450       | 638.1                      | 425.9                             |
| 16    | Orn-P-Orn-L-S- <b>AllylGly</b> -K-G-P- <b>AllylGly</b> -Tyr(OBn)           | C <sub>61</sub> H <sub>92</sub> N <sub>14</sub> O <sub>14</sub>    | 99.5     | 1245.4910       | 623.7                      | 1245.7 (m/z)                      |
| 17    | R-L-S- <b>AllylGly</b> -K-G-P- <b>AllylGly</b> -Tyr(OBn)                   | C <sub>52</sub> H <sub>77</sub> N <sub>13</sub> O <sub>12</sub>    | 100      | 1076.2670       | 539.2                      | 1076.8 (m/z)                      |
| 18    | <b>AllylGly</b> -K-G-P- <b>AllylGly</b> -Tyr(OBn)                          | C <sub>37</sub> H <sub>49</sub> N <sub>7</sub> O <sub>8</sub>      | 100      | 719.8400        | 361.0                      | 720.6 (m/z)                       |
| 19    | Pyr-R-P-R-L-S- <b>AllylGly</b> -K-G-P- <b>AllylGly</b> -Tyr(OBn)           | C <sub>68</sub> H <sub>101</sub> N <sub>19</sub> O <sub>16</sub>   | 100      | 1440.6730       | 721.8                      | 481.8                             |
| 20    | Ac-R-P-R-L-S- <b>AllylGly</b> -K-G-P- <b>AllylGly</b> -Tyr(OBn)            | C <sub>65</sub> H <sub>98</sub> N <sub>18</sub> O <sub>15</sub>    | 98.3     | 1371.6100       | 687.2                      | 458.7                             |
| 21    | Des-amino-R-P-R-L-S- <b>AllylGly</b> -K-G-P- <b>AllylGly</b> -Tyr(OBn)     | C <sub>63</sub> H <sub>95</sub> N <sub>17</sub> O <sub>14</sub>    | 95.7     | 1314.5580       | 658.6                      | 439.8                             |

<sup>a</sup> AllylGly residues in bold are cyclized via the olefin metathesis reaction, also called Ring Closing Metathesis (RCM) reaction.

<sup>b</sup> Sometimes, the m/z signal of the macrocyclic analogues was not observed, consistently with the presence of several positively charged residues.

**Ape13:** Pyr-R-P-R-L-S-H-K-G-P-M-P-F

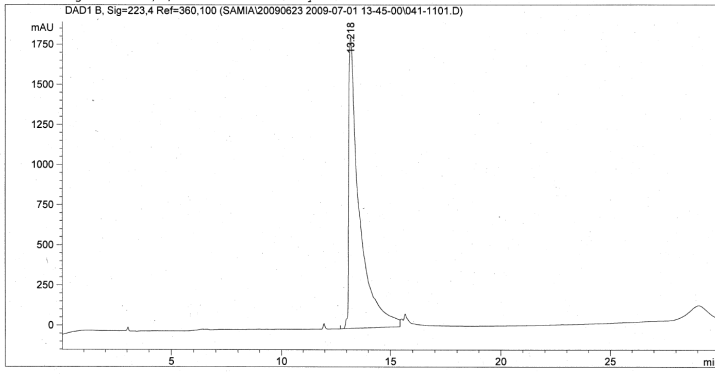

Area Percent Report

Sorted By : Signal  
Multiplier : 1.0000  
Dilution : 1.0000  
Use Multiplier & Dilution Factor with ISTDs

Signal 1: DAD1 B, Sig=223,4 Ref=360,100

| Peak # | RetTime [min] | Type | Width [min] | Area [mAU*s] | Height [mAU] | Area %   |
|--------|---------------|------|-------------|--------------|--------------|----------|
| 1      | 13.218        | BV   | 0.4536      | 6.06405e4    | 1816.00732   | 100.0000 |

Totals : 6.06405e4 1816.00732

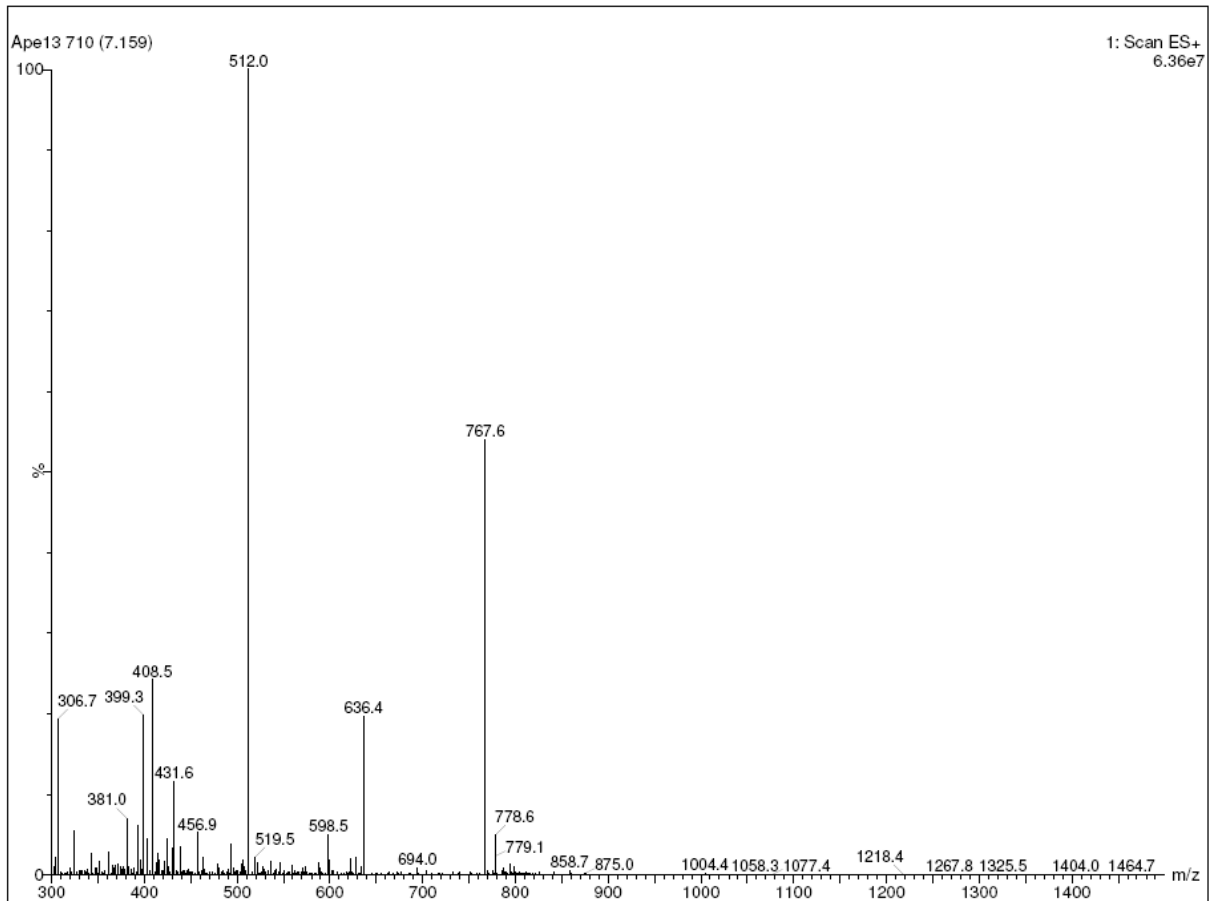

1: R-P-R-L-S-AllyGly-K-G-P-AllyGly-F

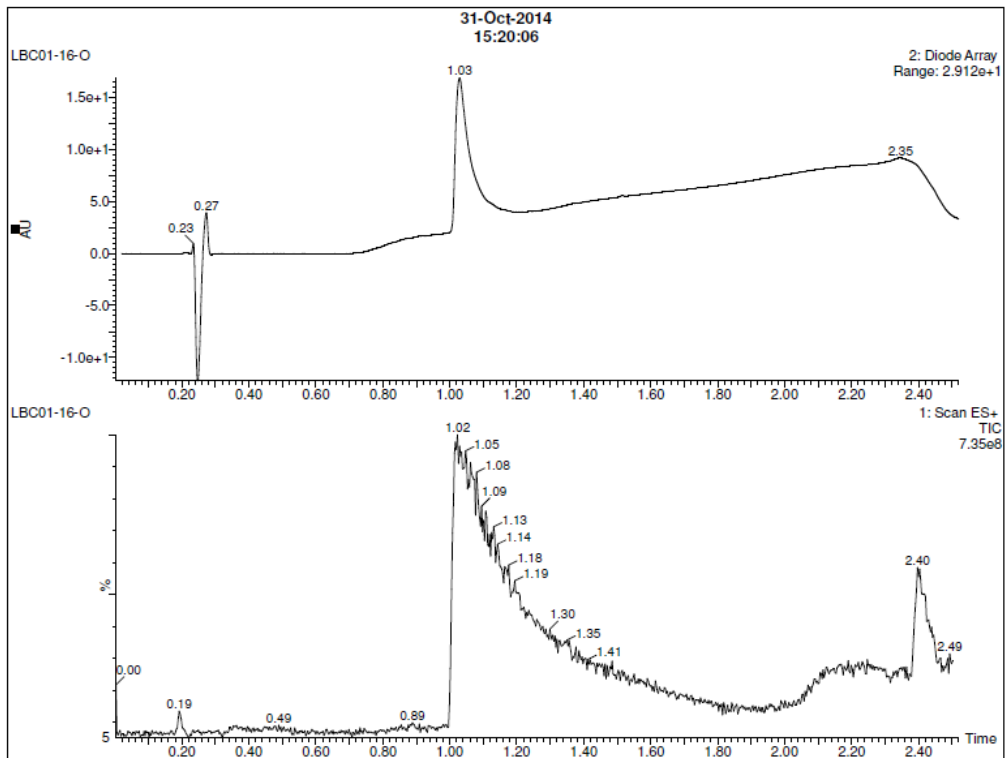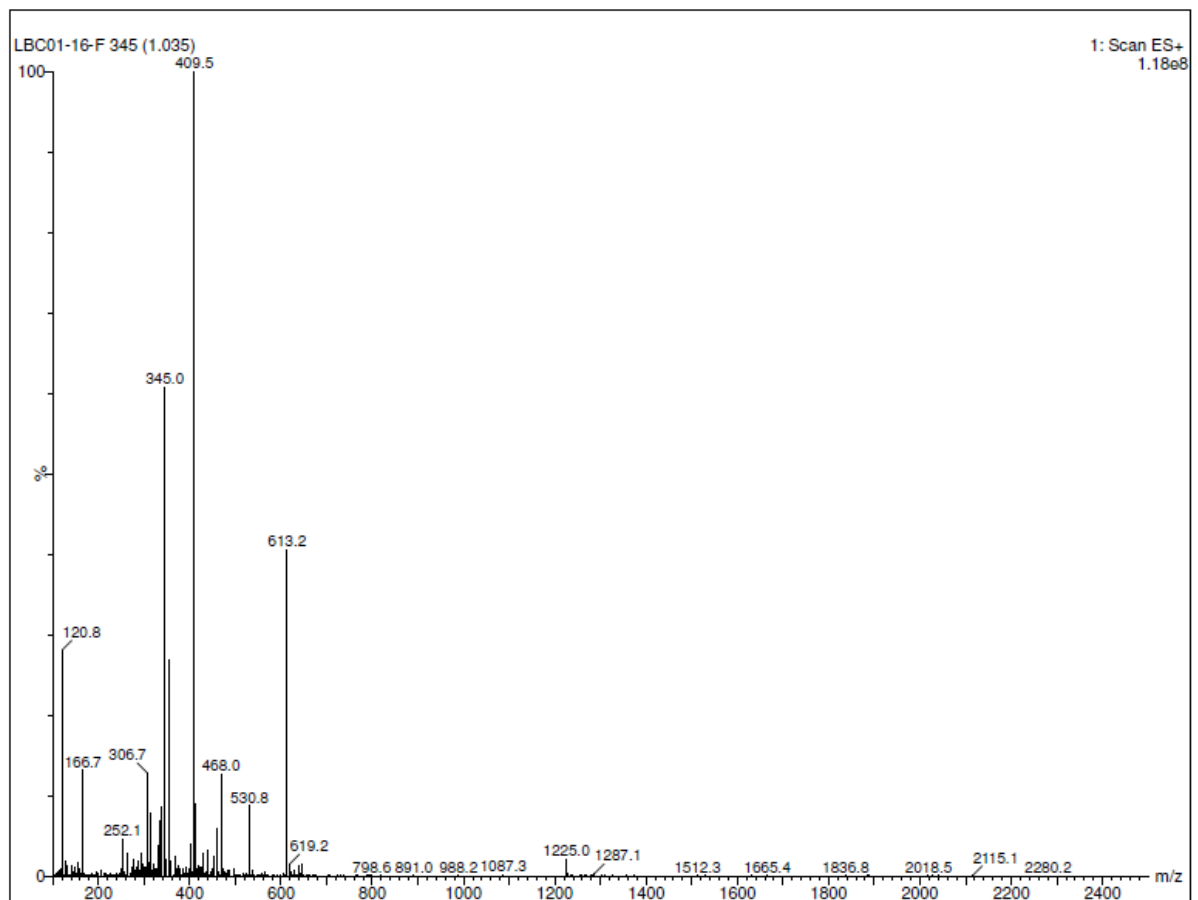

2: R-P-R-L-S-AllylGly-K-G-P-AllylGly-Tyr(OBn)

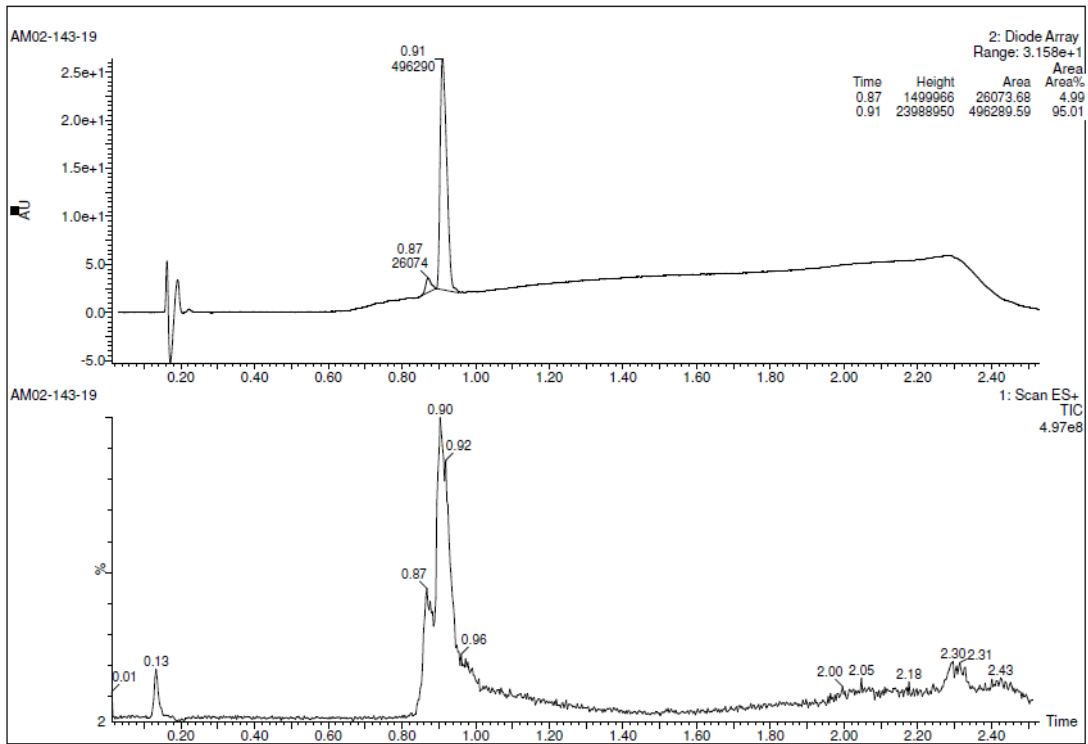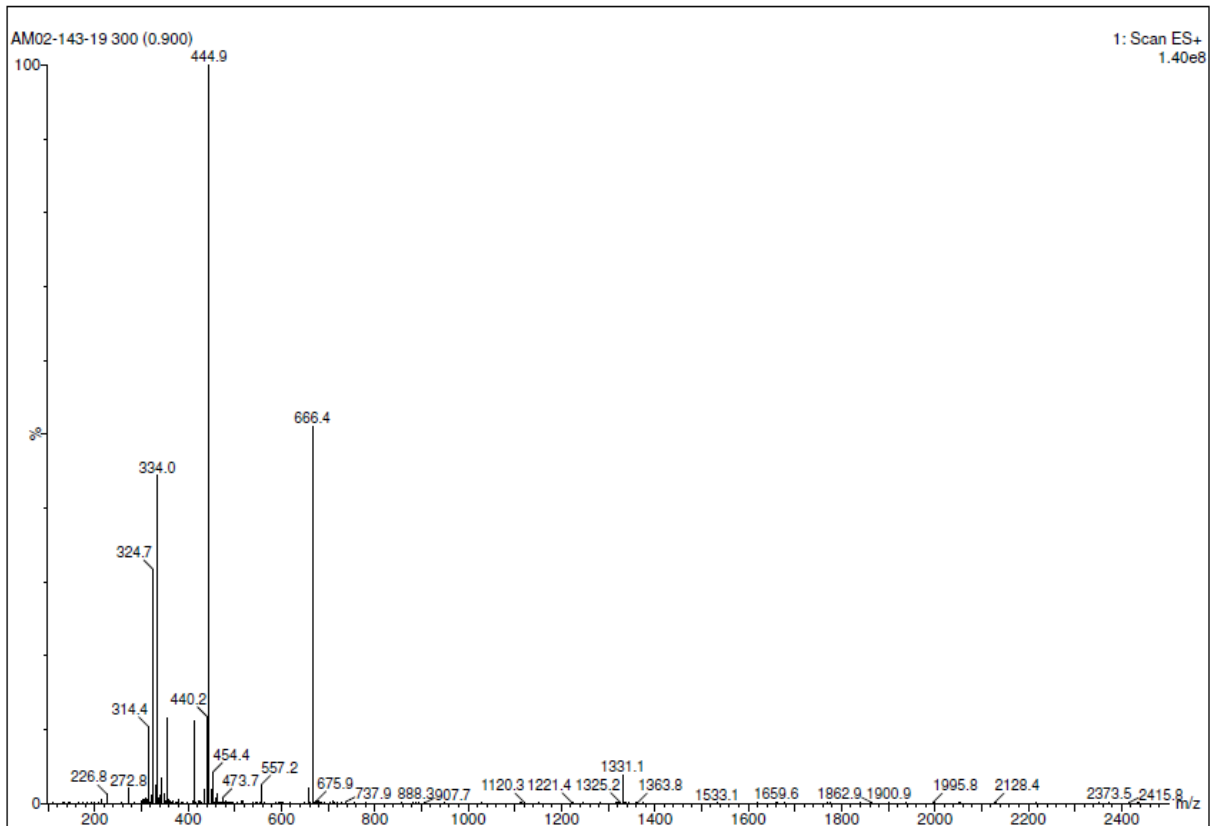

**3: R-P-R-L-S-AllylGly-K-G-P-AllylGly-A**

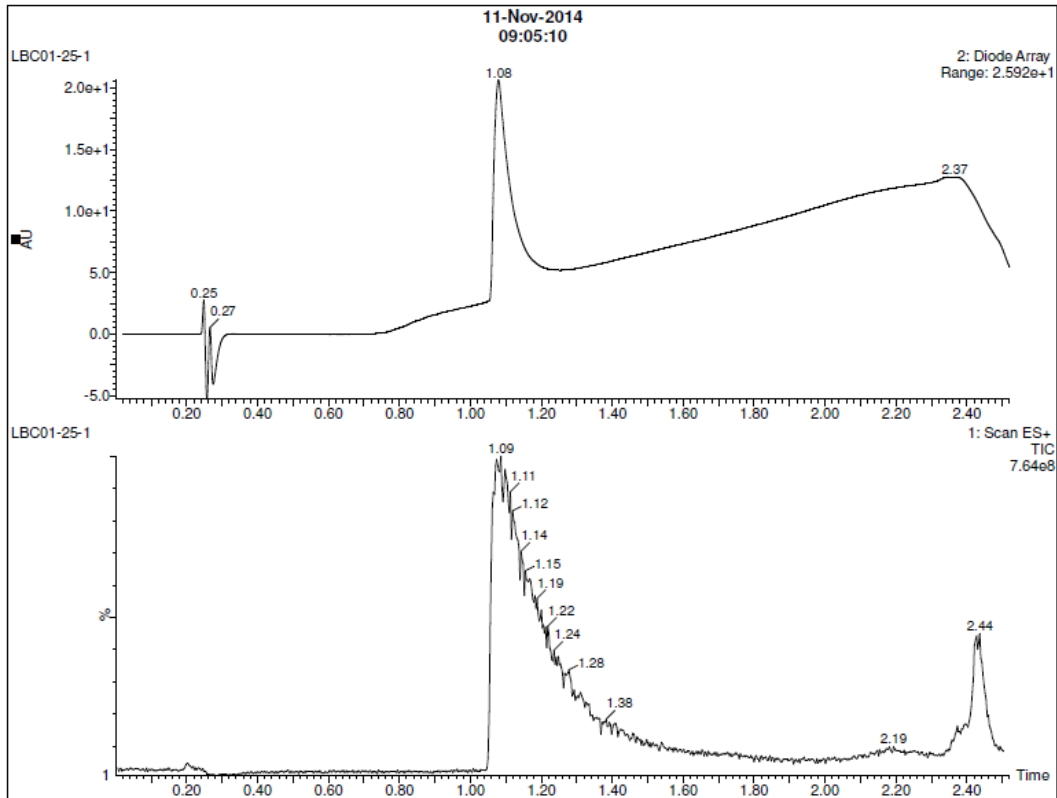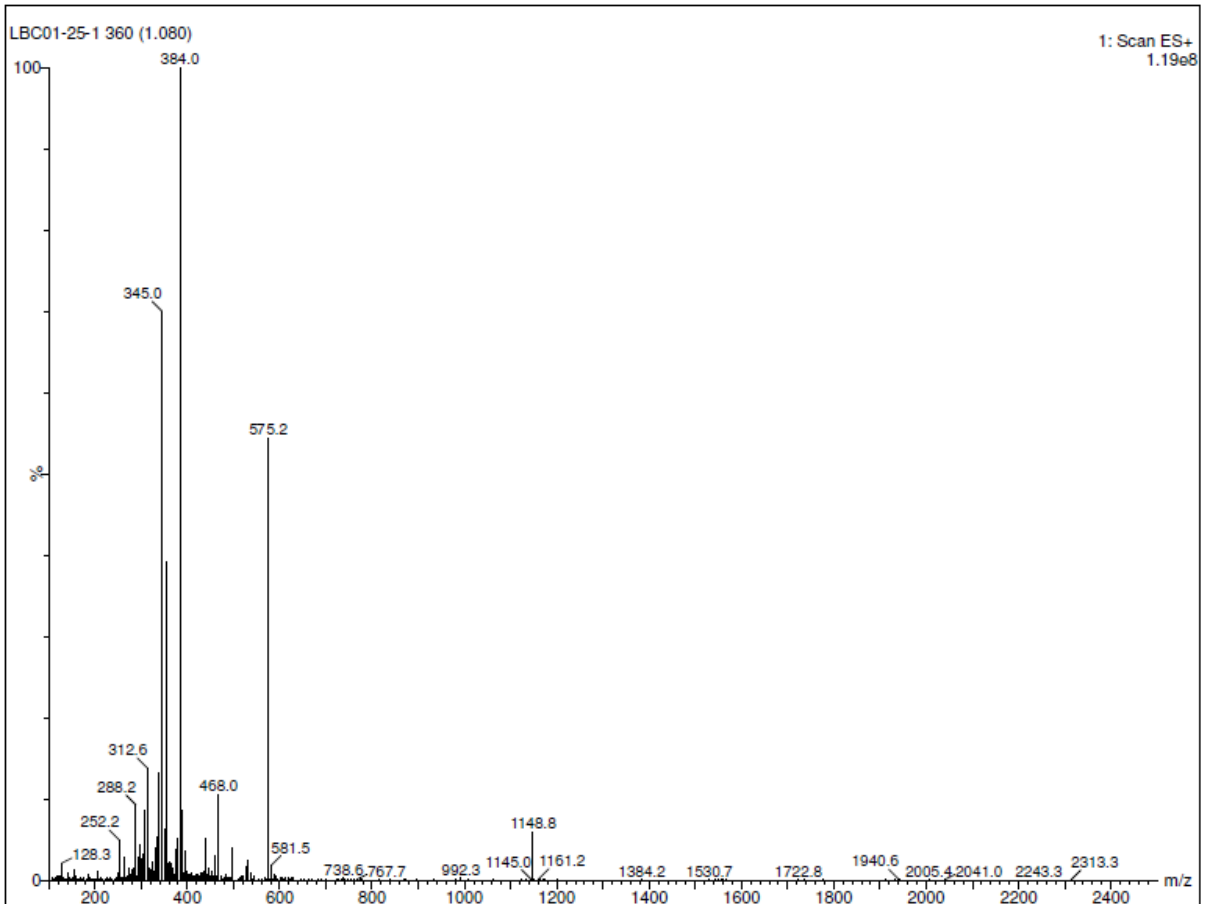

4: R-P-R-L-S-AllylGly-K-G-P-AllylGly

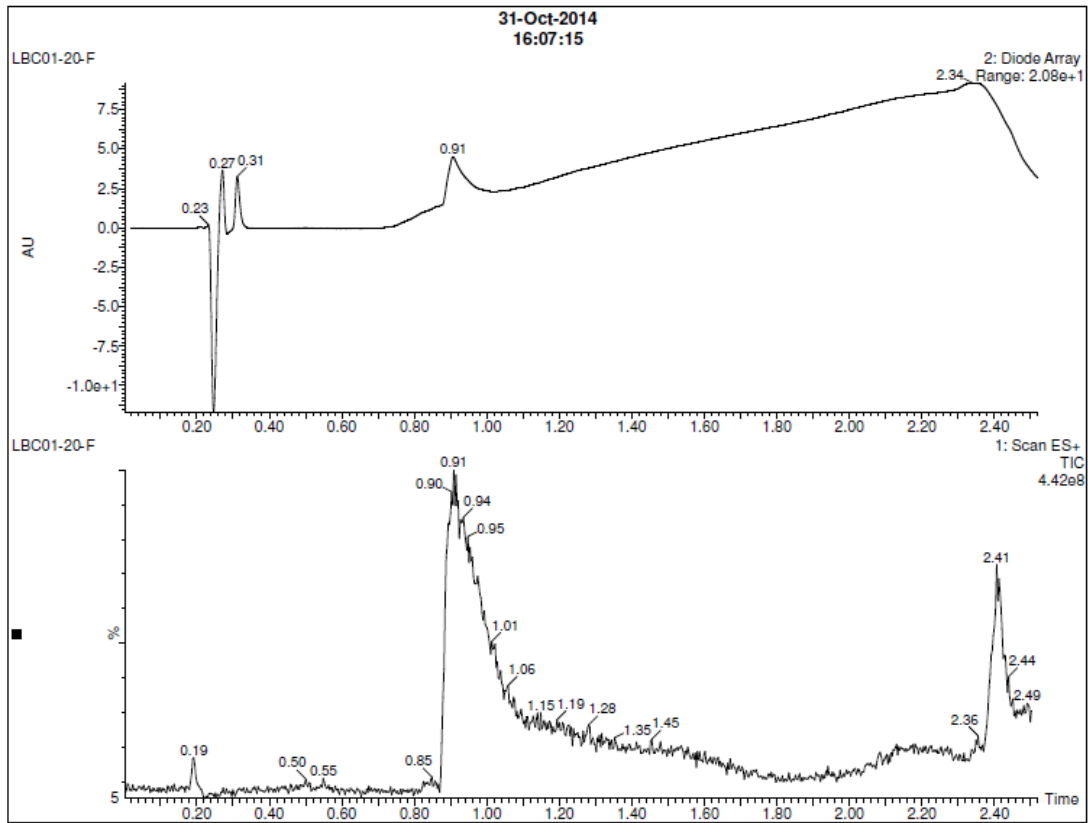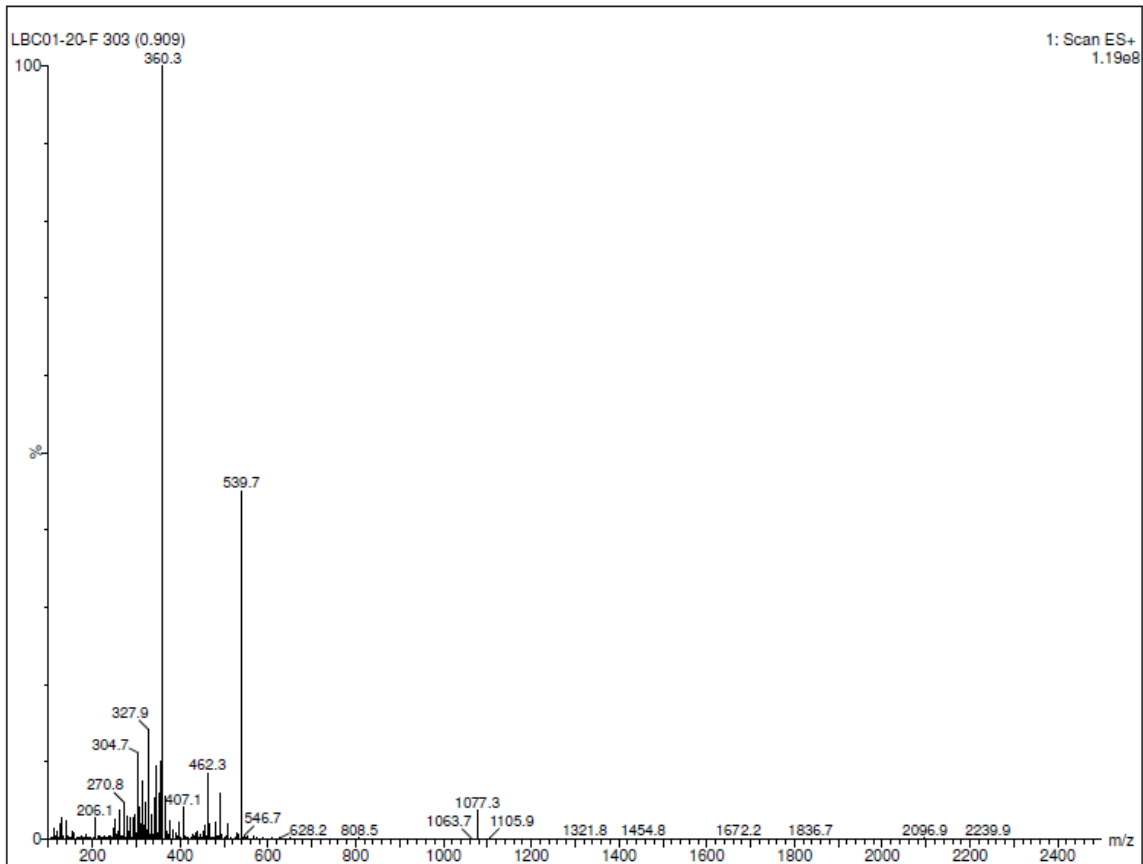

5: R-P-R-L-S-AllylGly-K-G-Tyr(OBn)-P-AllylGly

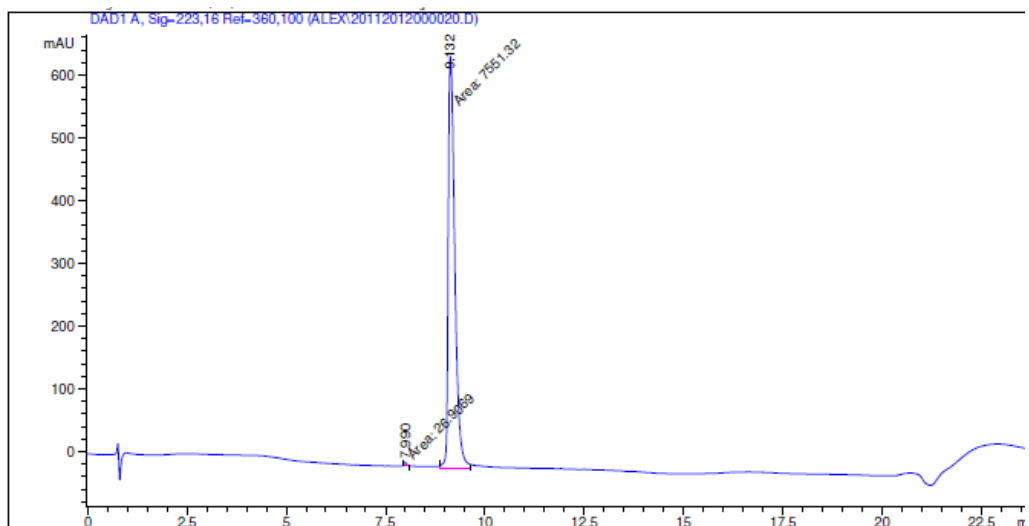

-----  
 Area Percent Report  
 -----

Sorted By : Signal  
 Multiplier : 1.0000  
 Dilution : 1.0000  
 Use Multiplier & Dilution Factor with ISTDs

Signal 1: DAD1 A, Sig-223,16 Ref-360,100

| Peak # | RetTime [min] | Type | Width [min] | Area [mAU*s] | Height [mAU] | Area %  |
|--------|---------------|------|-------------|--------------|--------------|---------|
| 1      | 7.990         | MM   | 0.0808      | 26.90690     | 5.55239      | 0.3551  |
| 2      | 9.132         | MM   | 0.1918      | 7551.32227   | 656.20282    | 99.6449 |

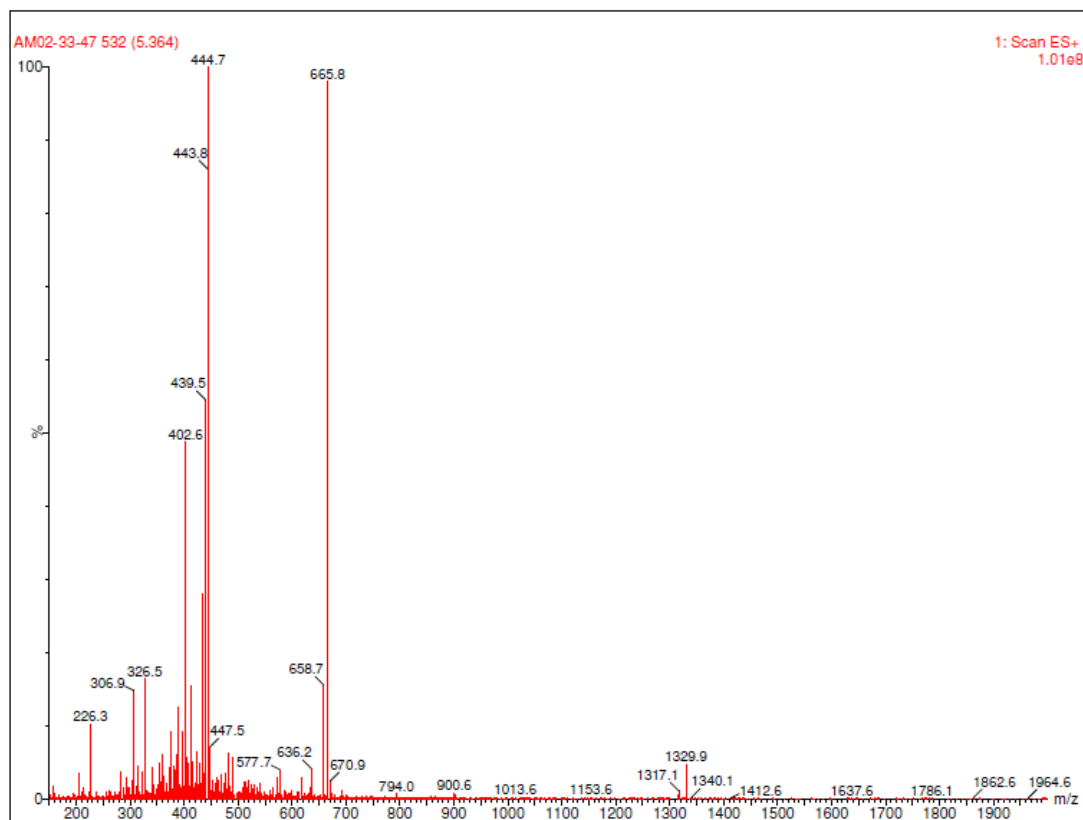

6: R-P-R-L-S-AllylGly-K-Tyr(OBn)-G-P-AllylGly



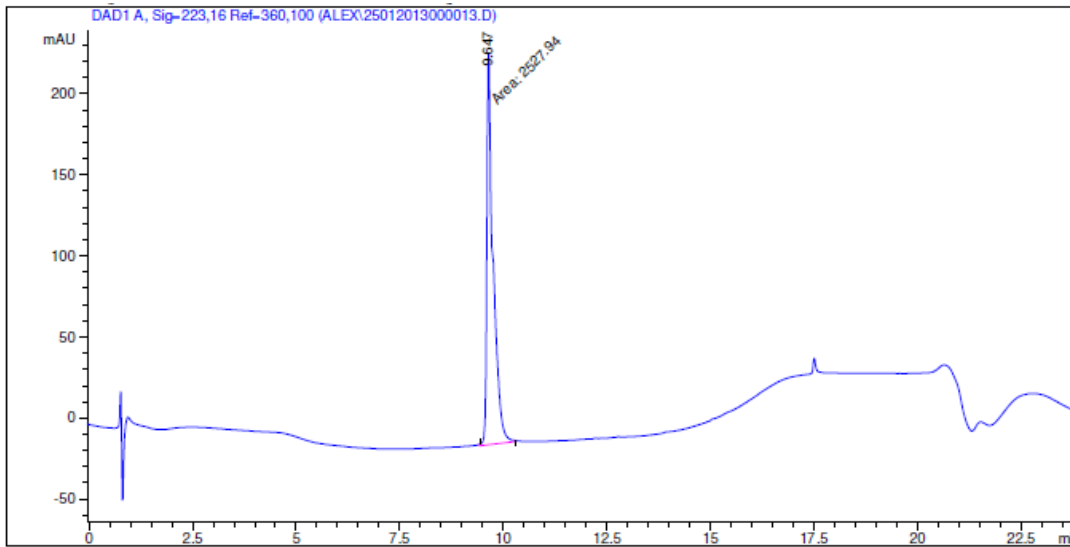

-----  
 Area Percent Report  
 -----

Sorted By : Signal  
 Multiplier : 1.0000  
 Dilution : 1.0000  
 Use Multiplier & Dilution Factor with ISTDs

Signal 1: DAD1 A, Sig-223,16 Ref-360,100

| Peak # | RetTime [min] | Type | Width [min] | Area [mAU*s] | Height [mAU] | Area %   |
|--------|---------------|------|-------------|--------------|--------------|----------|
| 1      | 9.647         | MM   | 0.1743      | 2527.93799   | 241.76709    | 100.0000 |

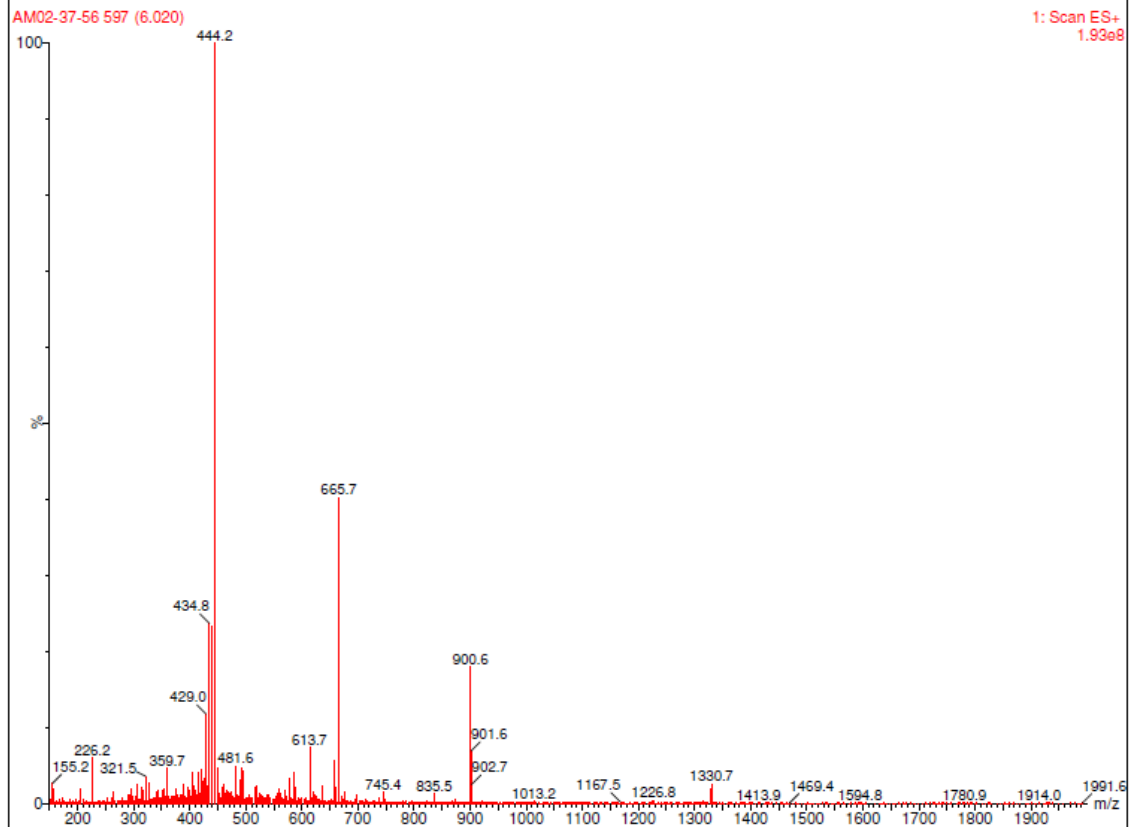

7: R-P-R-L-S-AllyIGly-K-G-P-AllyIGly-P-Tyr(OBn)

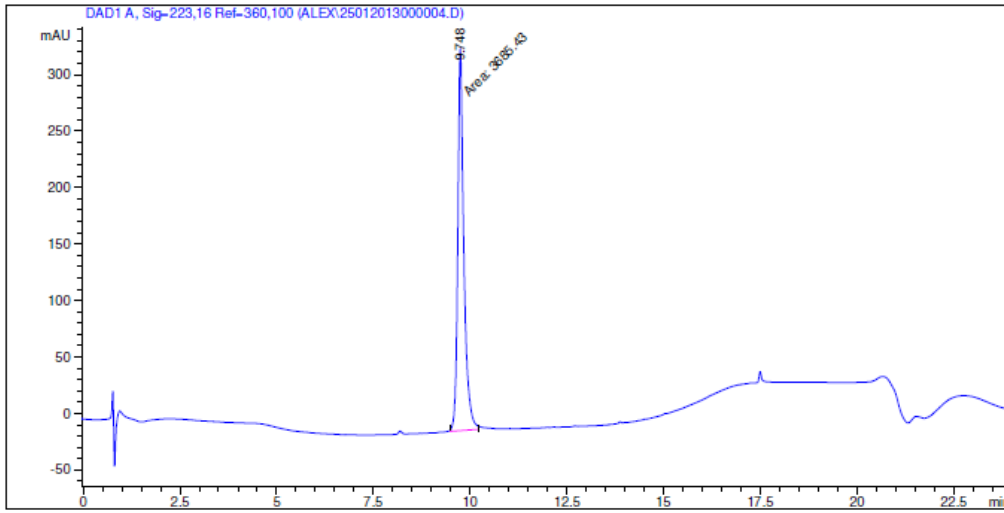

-----  
 Area Percent Report  
 -----

Sorted By : Signal  
 Multiplier : 1.0000  
 Dilution : 1.0000  
 Use Multiplier & Dilution Factor with ISTDs

Signal 1: DAD1 A, Sig-223,16 Ref-360,100

| Peak # | RetTime [min] | Type | Width [min] | Area [mAU*s] | Height [mAU] | Area %   |
|--------|---------------|------|-------------|--------------|--------------|----------|
| 1      | 9.748         | MM   | 0.1815      | 3685.42554   | 338.50626    | 100.0000 |

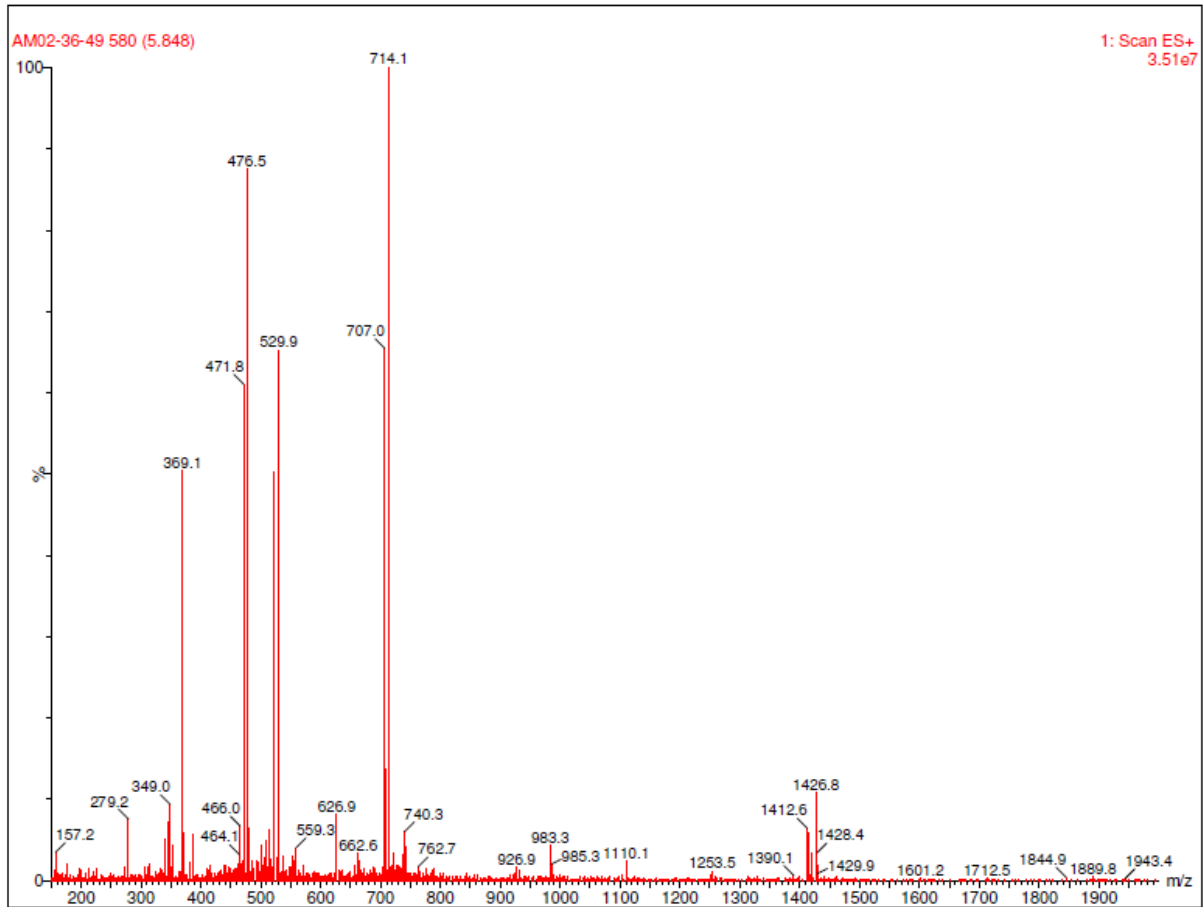

**8:** R-P-R-L-S-AllylGly-K-G-P-AllylGly-βAla-Tyr(OBn)

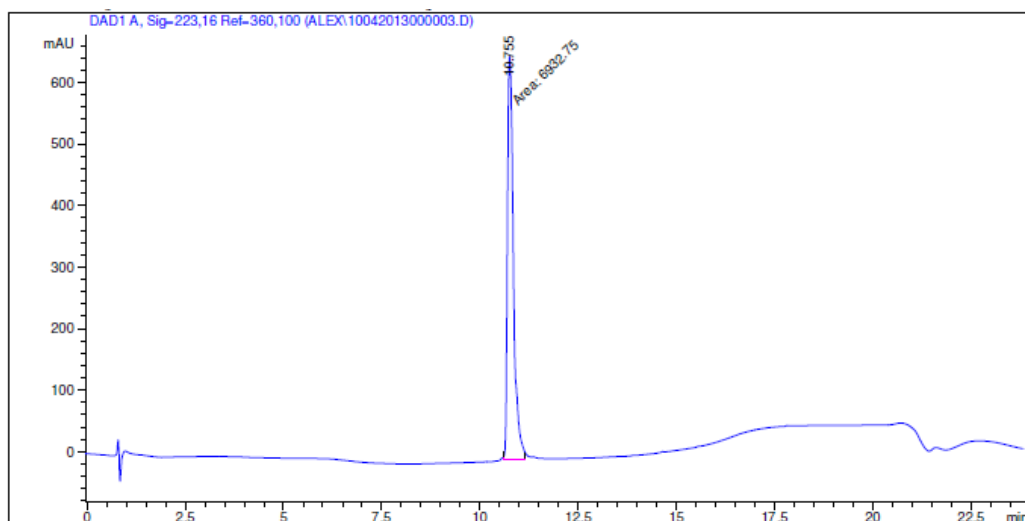

Area Percent Report

Sorted By : Signal  
Multiplier : 1.0000  
Dilution : 1.0000  
Use Multiplier & Dilution Factor with ISTDs

Signal 1: DAD1 A, Sig-223,16 Ref-360,100

| Peak # | RetTime [min] | Type | Width [min] | Area [mAU*s] | Height [mAU] | Area %   |
|--------|---------------|------|-------------|--------------|--------------|----------|
| 1      | 10.755        | MM   | 0.1767      | 6932.75244   | 654.08435    | 100.0000 |

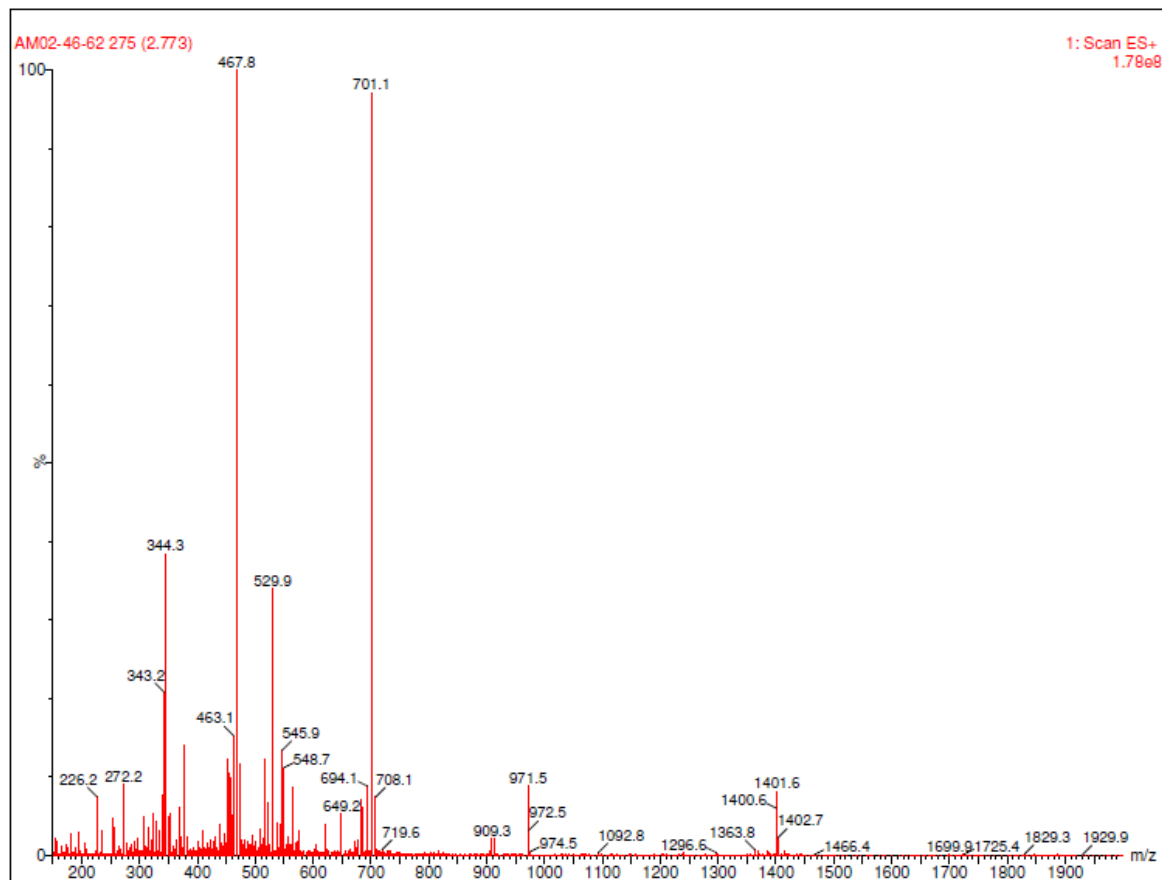

9: R-P-R-L-S-AllyGly-K-G-P-AllyGly-γAbu-Tyr(OBn)

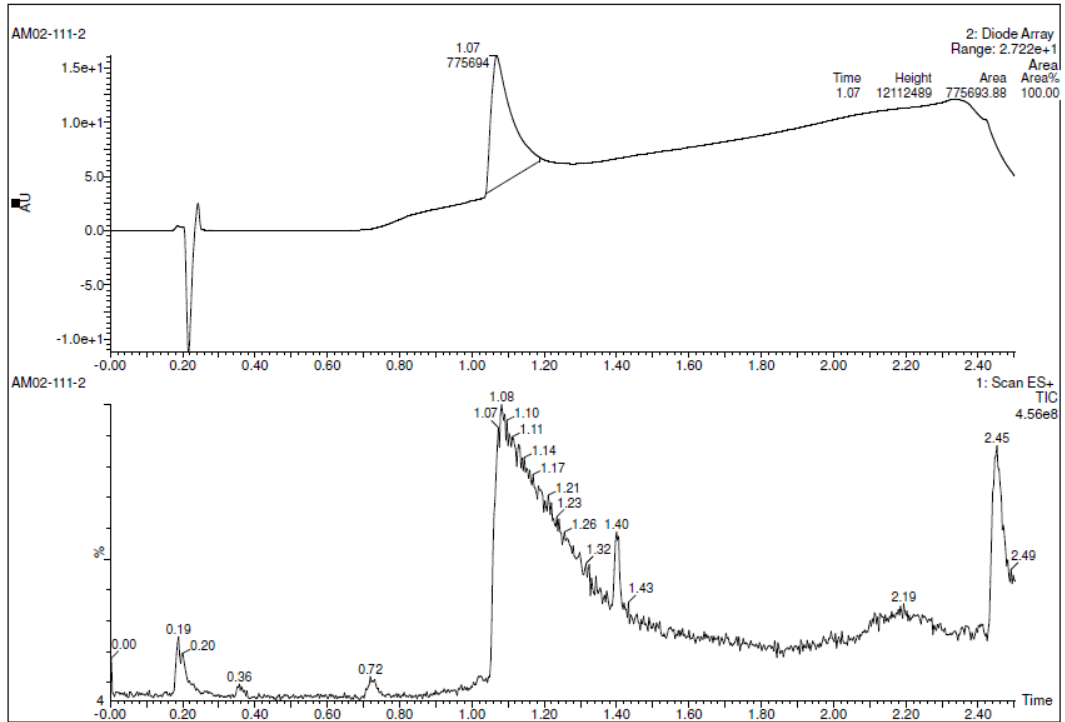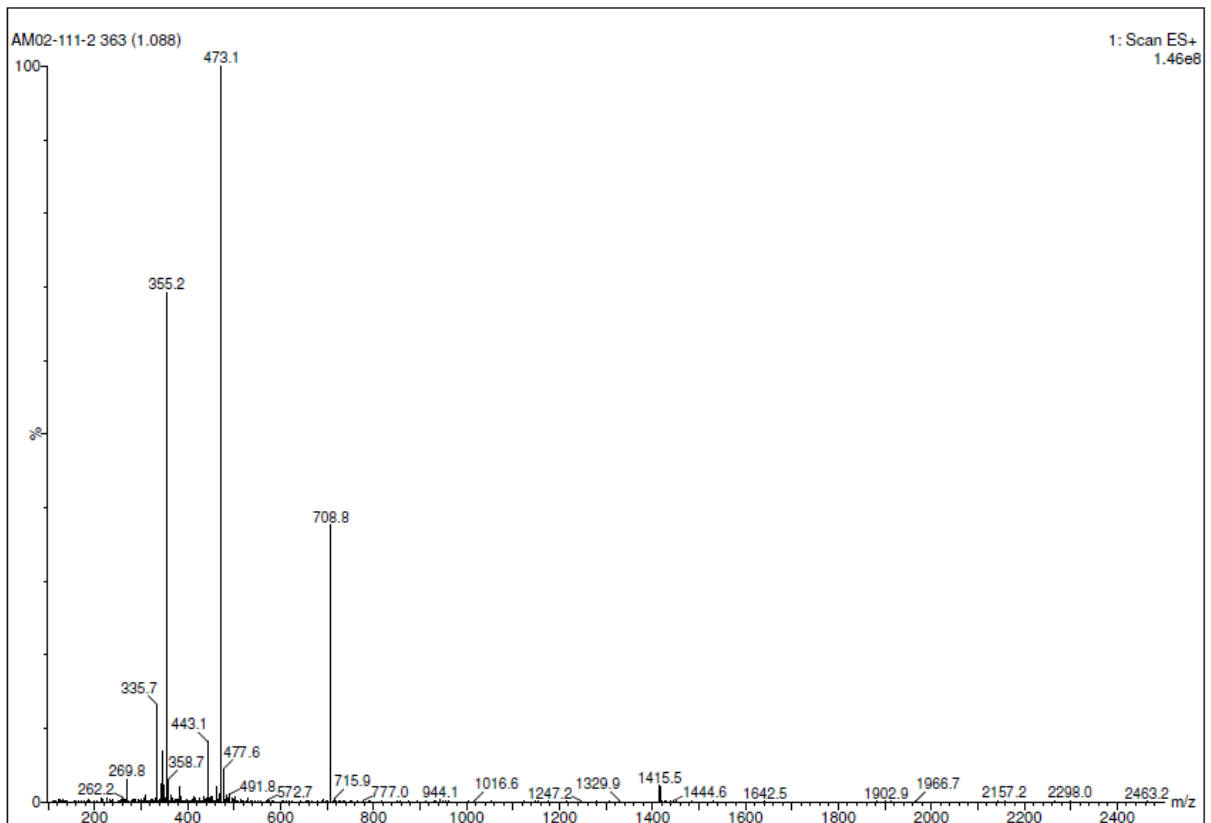

10: R-P-R-L-S-AllylGly-K-G-P-AllylGly-A-Tyr(OBn)

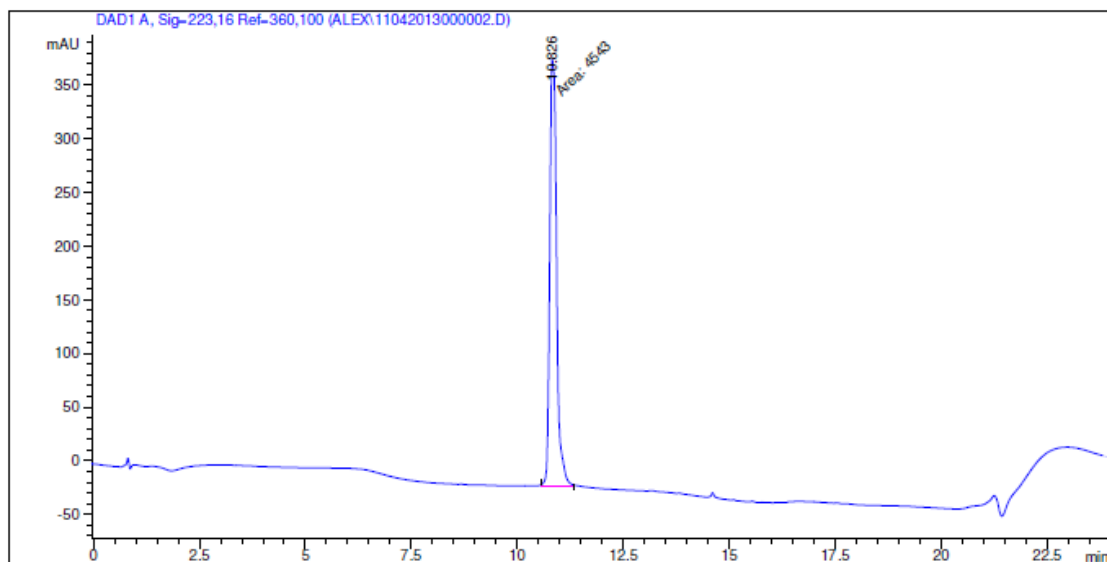

-----  
 Area Percent Report  
 -----

Sorted By : Signal  
 Multiplier : 1.0000  
 Dilution : 1.0000  
 Use Multiplier & Dilution Factor with ISTDs

Signal 1: DAD1 A, Sig=223,16 Ref=360,100

| Peak # | RetTime [min] | Type | Width [min] | Area [mAU*s] | Height [mAU] | Area %   |
|--------|---------------|------|-------------|--------------|--------------|----------|
| 1      | 10.826        | MM   | 0.1897      | 4543.00195   | 399.17548    | 100.0000 |

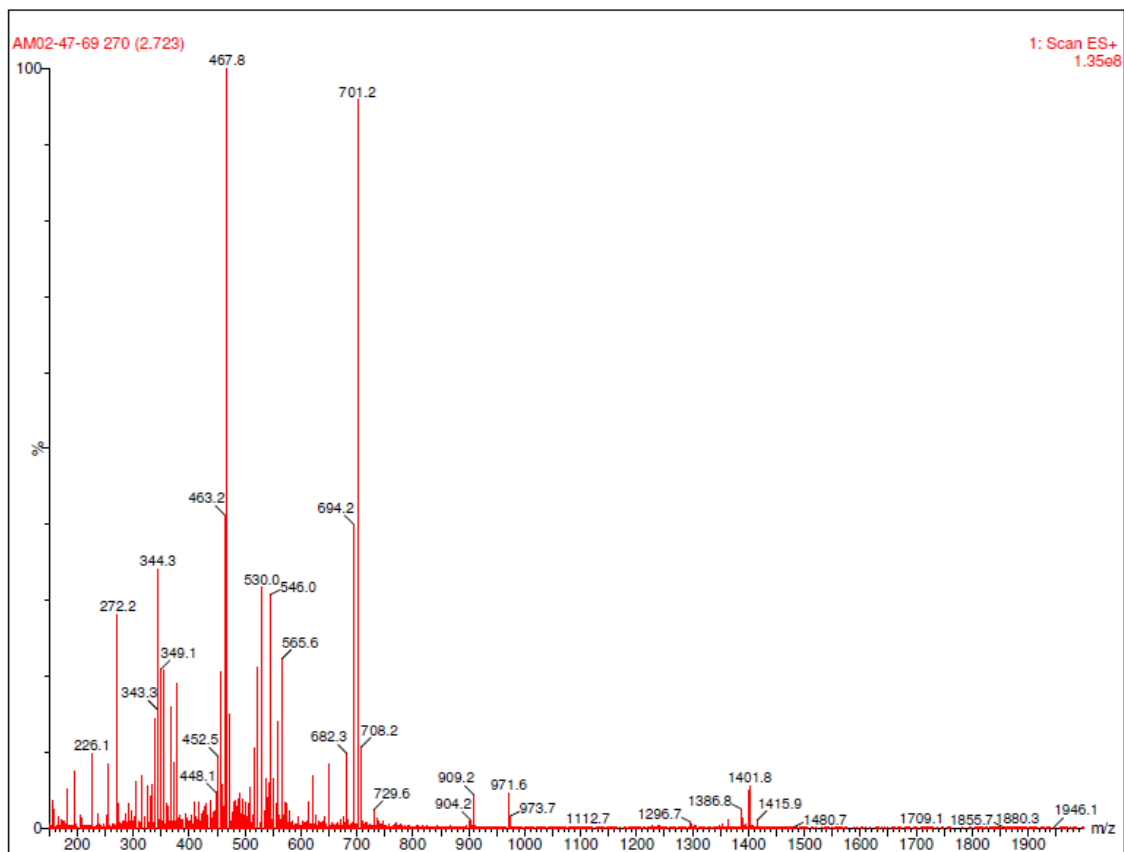

11: R-P-R-L-S-AllyIGly-[8-aminocaprylic]-AllyIGly-P-Tyr(OBn)

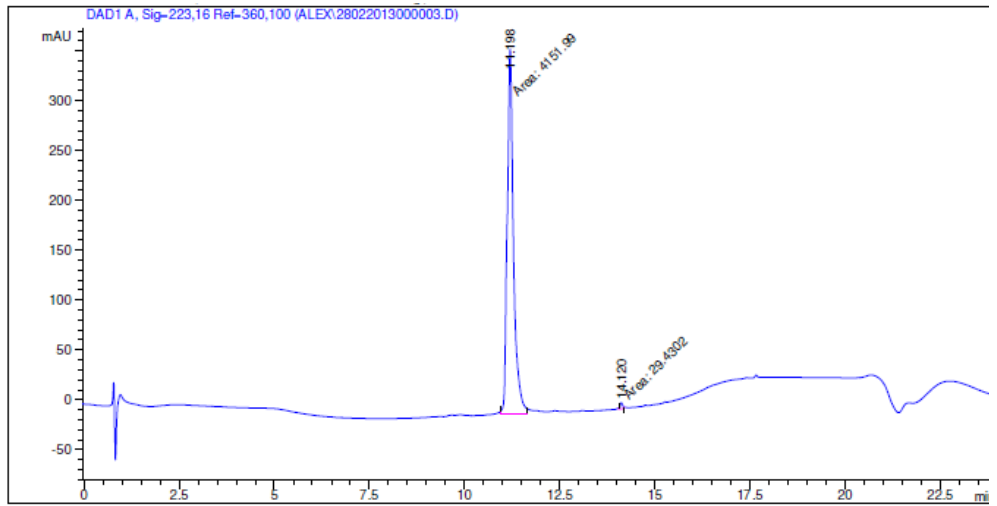

Area Percent Report

Sorted By : Signal  
Multiplier : 1.0000  
Dilution : 1.0000  
Use Multiplier & Dilution Factor with ISTDs

Signal 1: DAD1 A, Sig-223,16 Ref-360,100

| Peak # | RetTime [min] | Type | Width [min] | Area [mAU*s] | Height [mAU] | Area %  |
|--------|---------------|------|-------------|--------------|--------------|---------|
| 1      | 11.198        | MM   | 0.1894      | 4151.98779   | 365.37491    | 99.2962 |
| 2      | 14.120        | MM   | 0.0802      | 29.43024     | 6.11297      | 0.7038  |

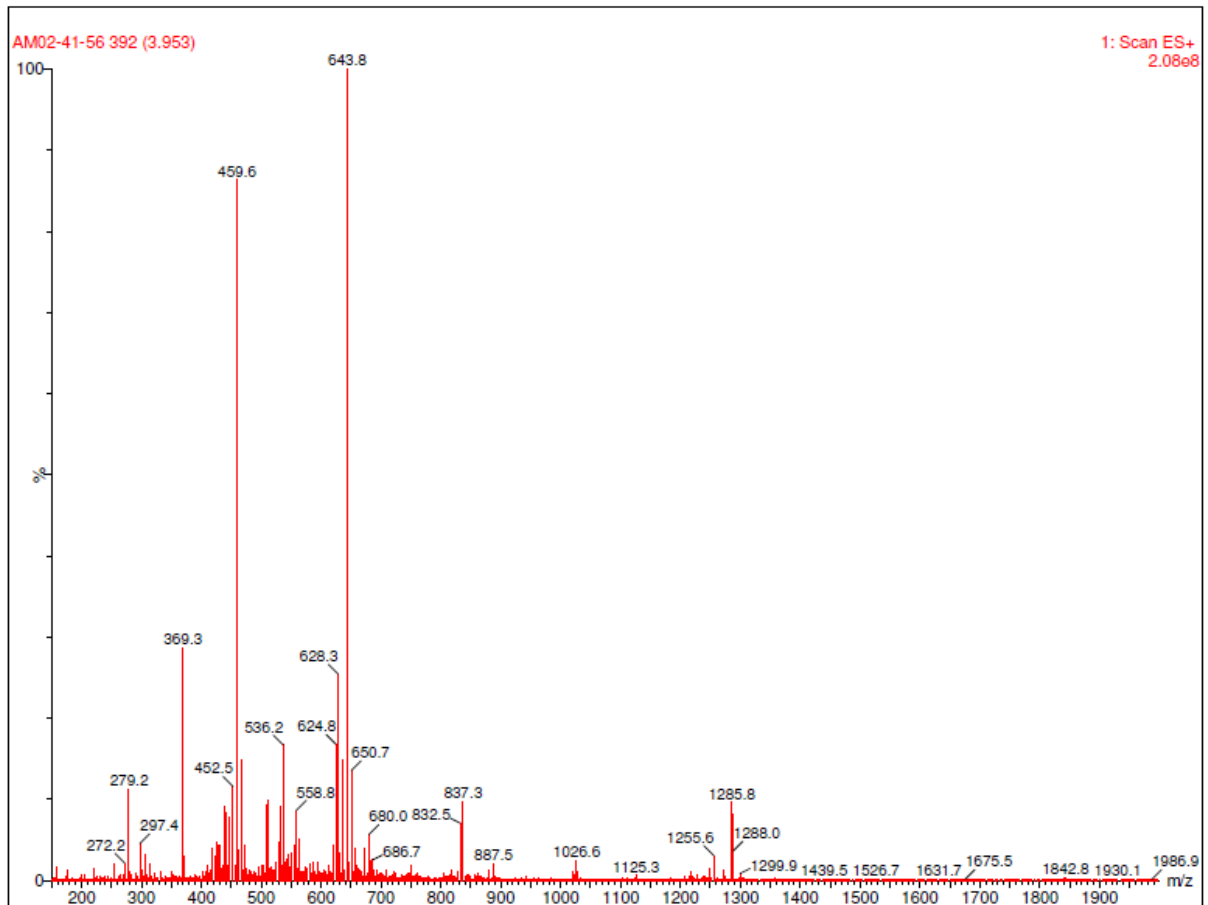

12: R-P-R-L-S-AllylGly-βAla-βAla-AllylGly-Tyr(OBn)

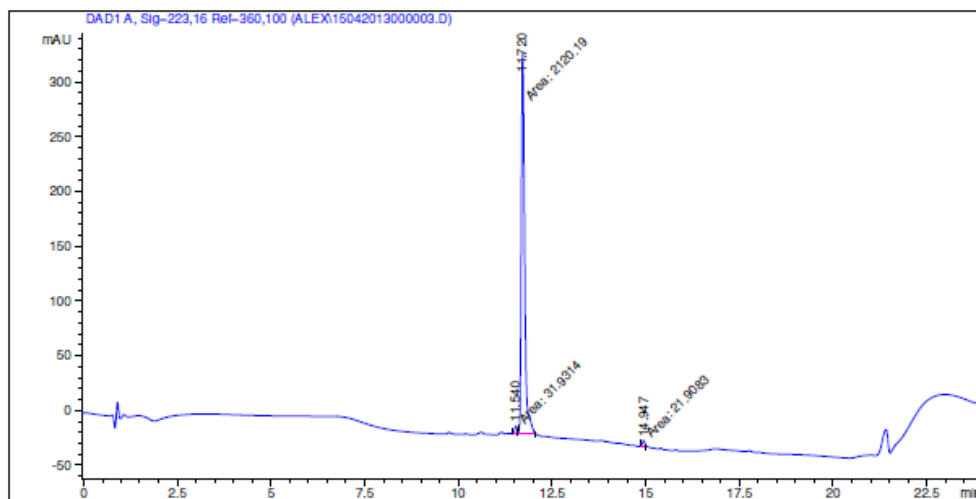

=====  
 Area Percent Report  
 =====

Sorted By : Signal  
 Multiplier : 1.0000  
 Dilution : 1.0000  
 Use Multiplier & Dilution Factor with ISTDs

Signal 1: DAD1 A, Sig=223,16 Ref=360,100

| Peak # | RetTime [min] | Type | Width [min] | Area [mAU*s] | Height [mAU] | Area %  |
|--------|---------------|------|-------------|--------------|--------------|---------|
| 1      | 11.540        | MM   | 0.0787      | 31.93145     | 6.76066      | 1.4688  |
| 2      | 11.720        | MM   | 0.1018      | 2120.18774   | 346.96326    | 97.5235 |
| 3      | 14.947        | MM   | 0.0689      | 21.90834     | 5.30213      | 1.0077  |

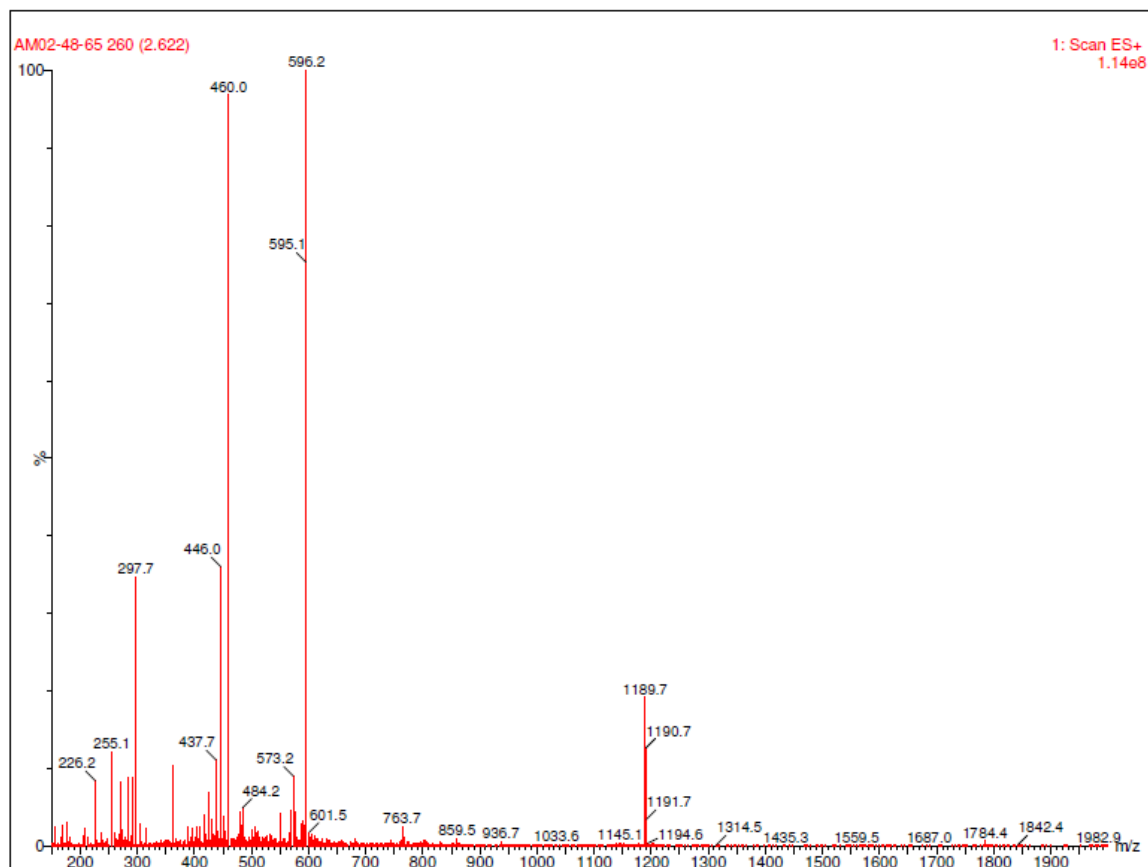

13: R-P-R-L-S-AllylGly-βAla-βAla-AllylGly-P-Tyr(OBn)

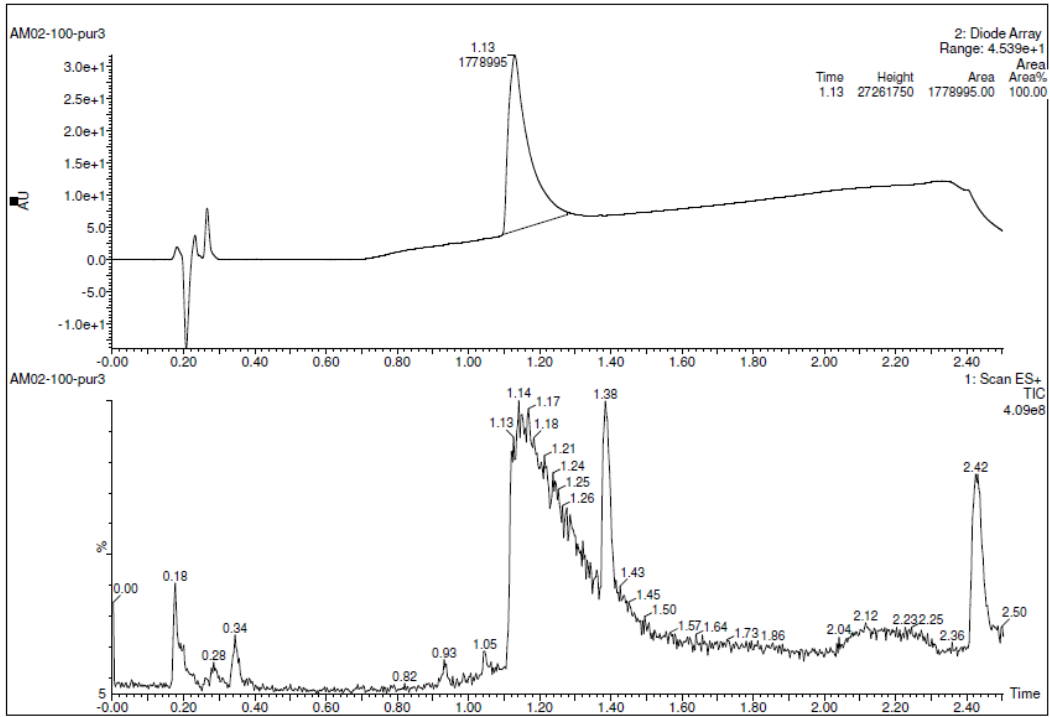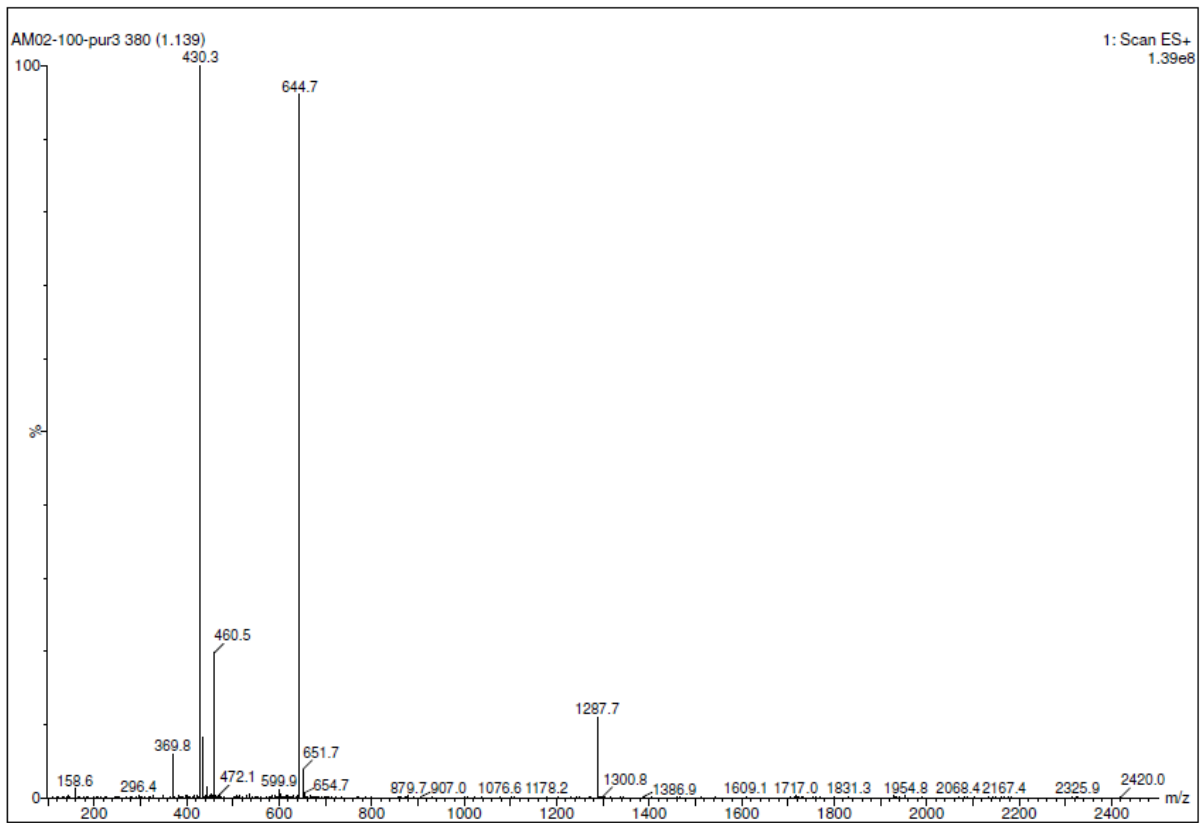

14: R-P-R-L-S-AllyIGly-Nle-G-P-AllyIGly-Tyr(OBn)



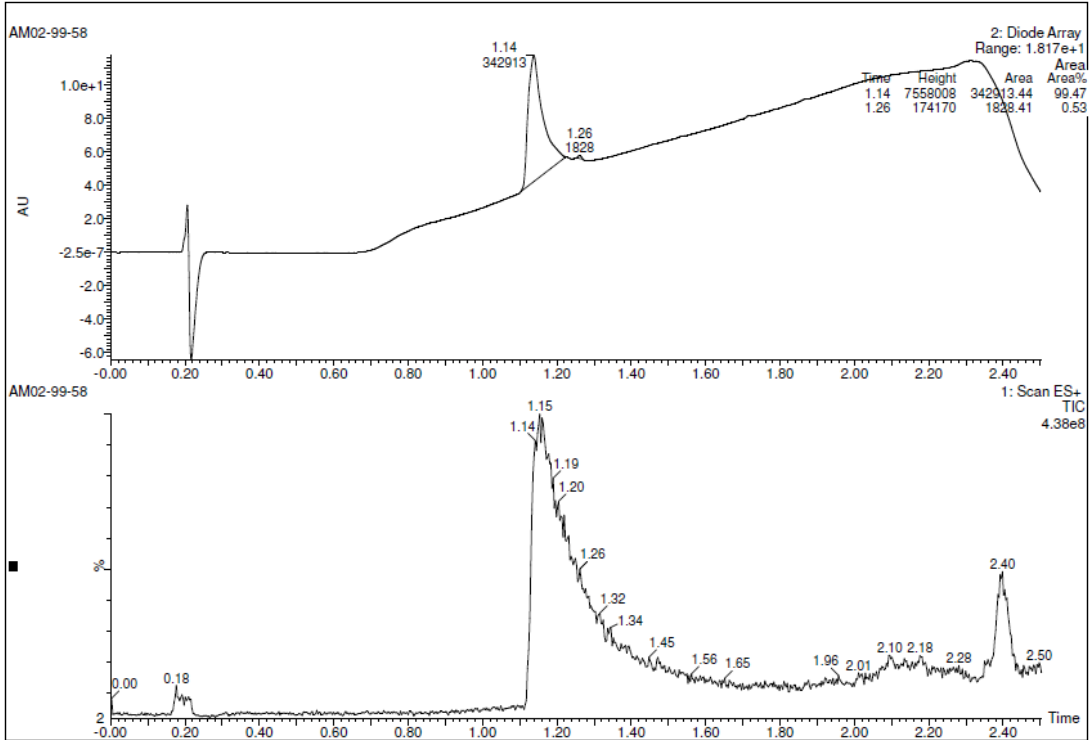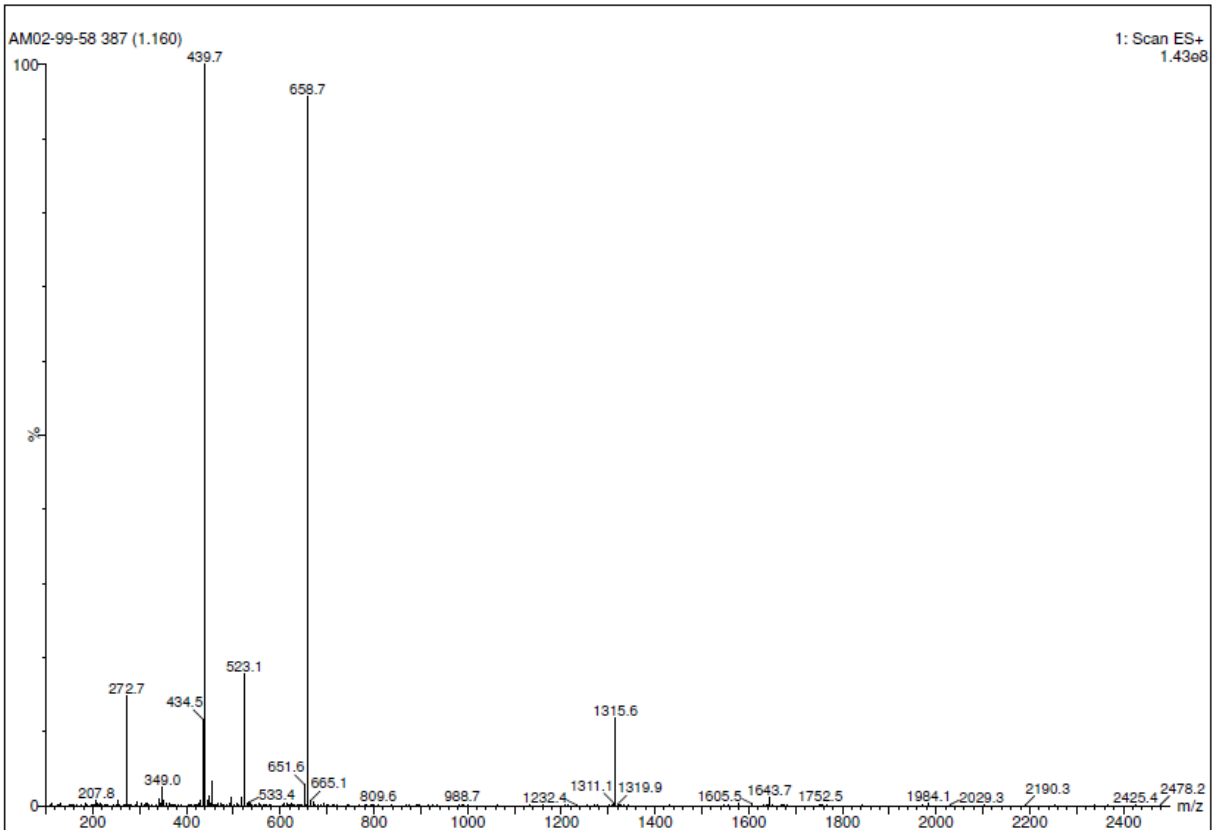

15: K-P-K-L-S-AllylGly-K-G-P-AllylGly-Tyr(OBn)

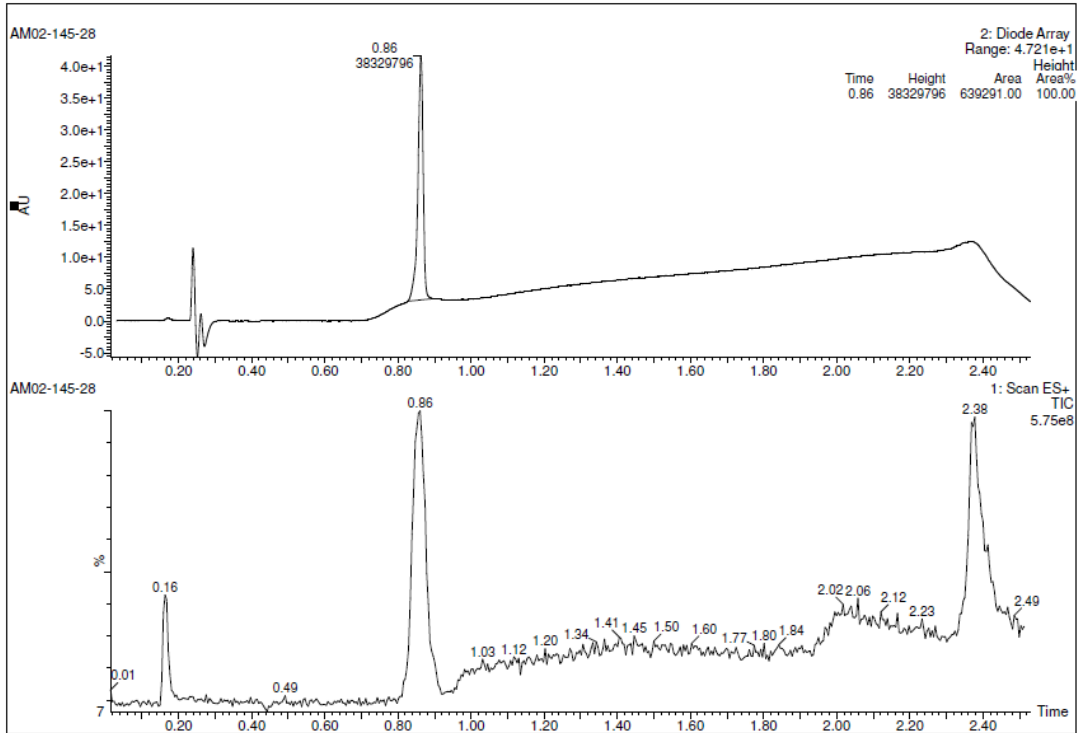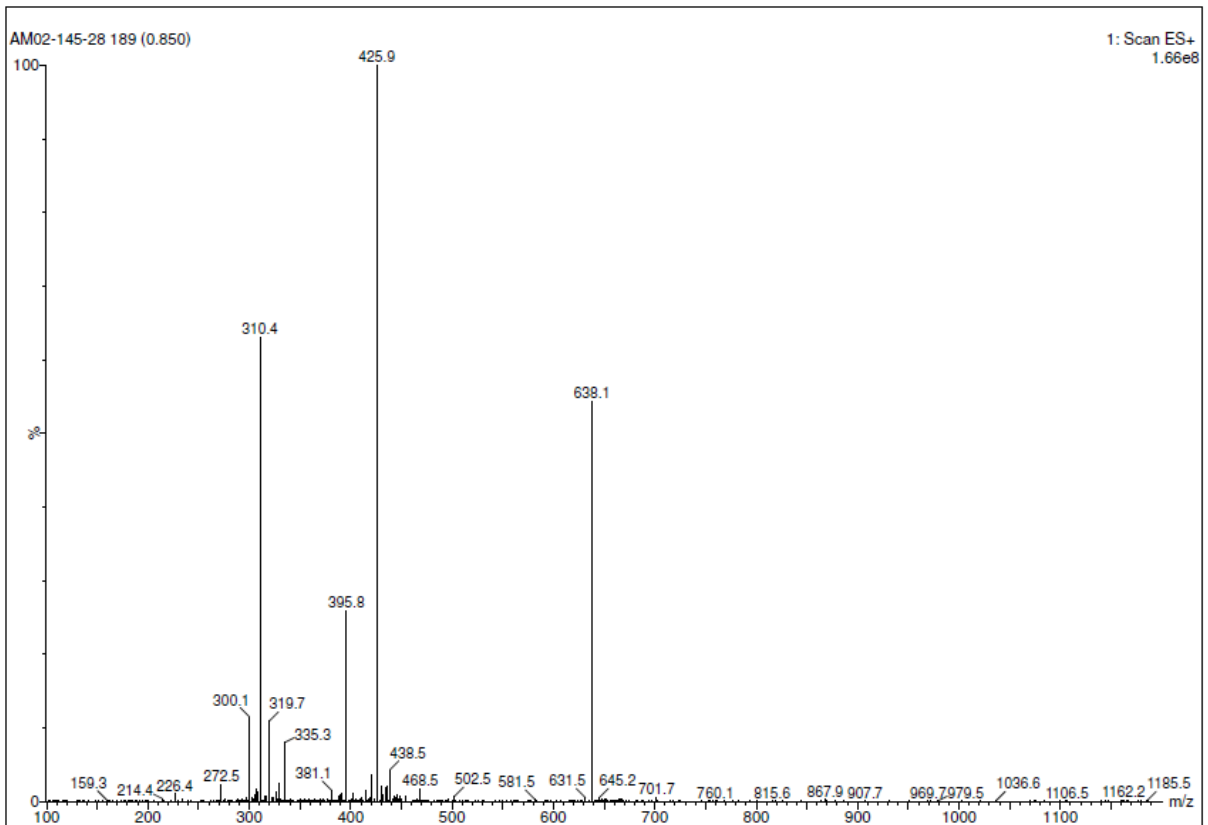

16: Orn-P-Orn-L-S-AllylGly-K-G-P-AllylGly-Tyr(OBn)

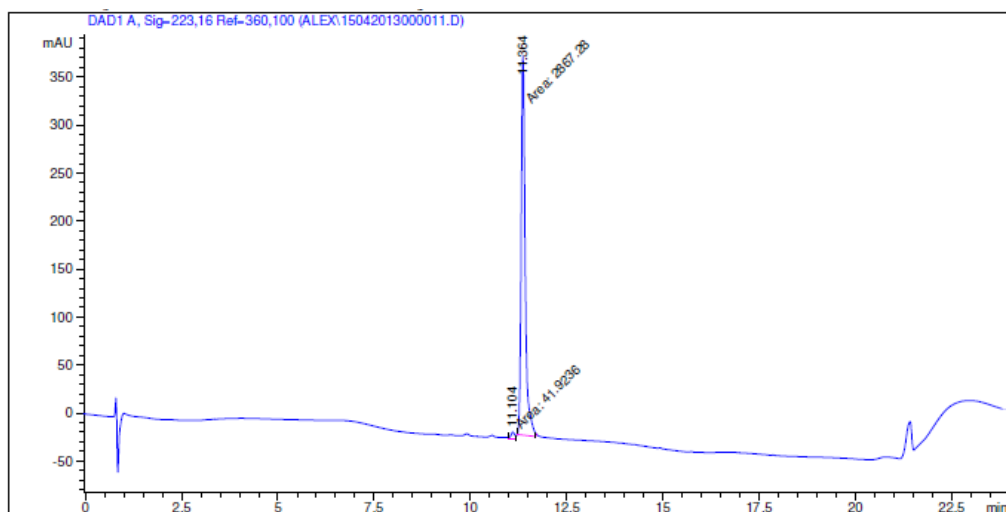

-----  
 Area Percent Report  
 -----

Sorted By : Signal  
 Multiplier : 1.0000  
 Dilution : 1.0000  
 Use Multiplier & Dilution Factor with ISTDs

Signal 1: DAD1 A, Sig-223,16 Ref-360,100

| Peak # | RetTime [min] | Type | Width [min] | Area [mAU*s] | Height [mAU] | Area %  |
|--------|---------------|------|-------------|--------------|--------------|---------|
| 1      | 11.104        | MM   | 0.1044      | 41.92359     | 6.69498      | 1.4411  |
| 2      | 11.364        | MM   | 0.1208      | 2867.28271   | 395.73755    | 98.5589 |

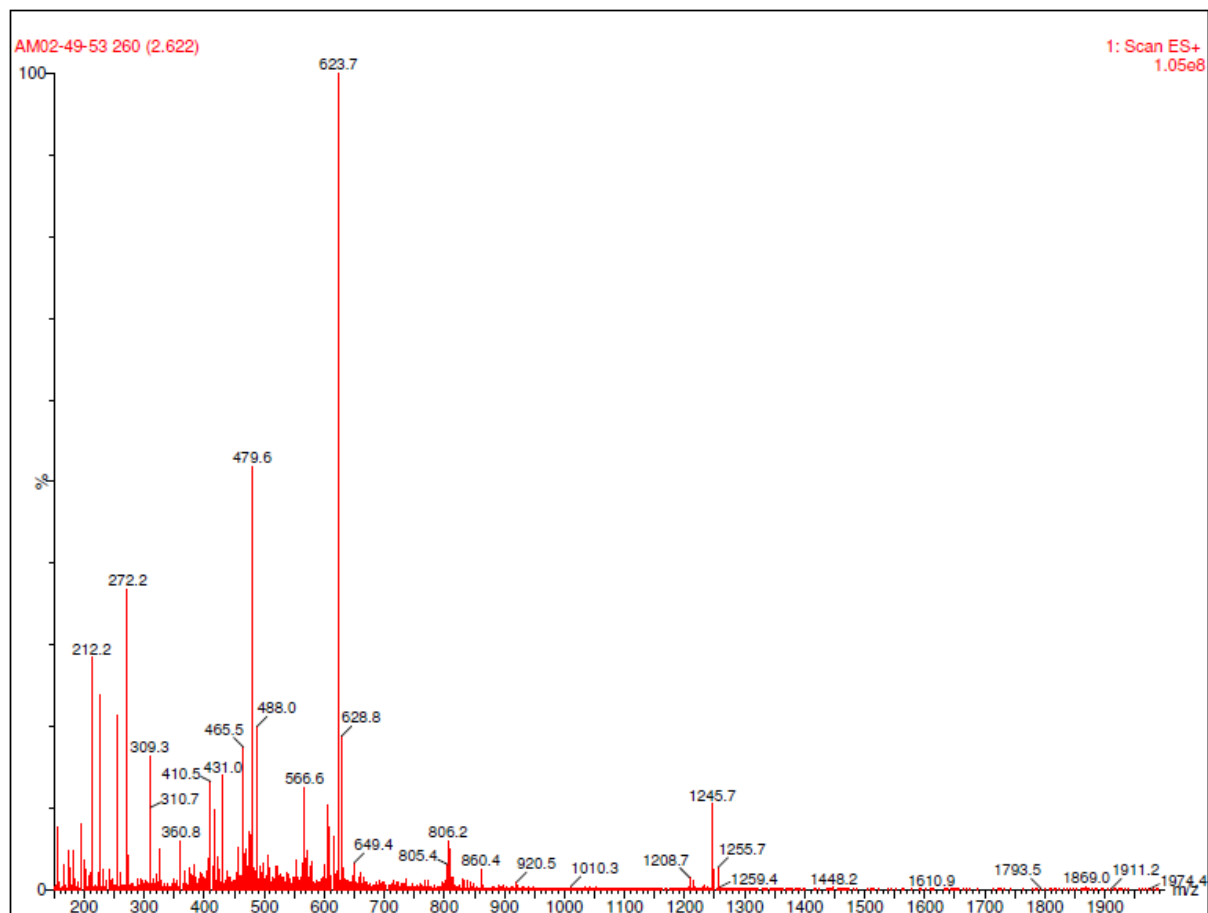

17: R-L-S-AllylGly-K-G-P-AllylGly-Tyr(OBn)

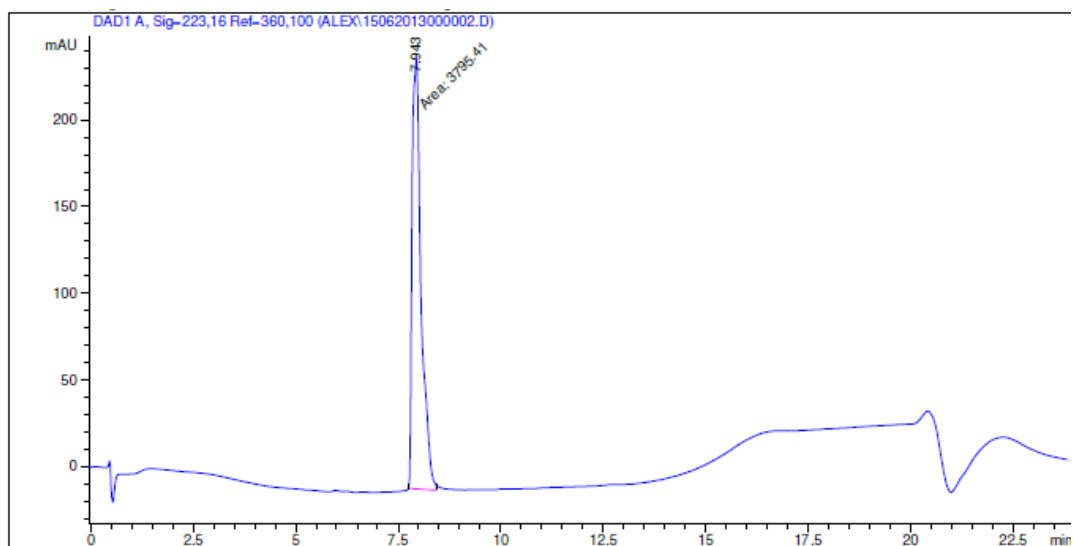

-----  
 Area Percent Report  
 -----

Sorted By : Signal  
 Multiplier : 1.0000  
 Dilution : 1.0000  
 Use Multiplier & Dilution Factor with ISTDs

Signal 1: DAD1 A, Sig-223,16 Ref-360,100

| Peak # | RetTime [min] | Type | Width [min] | Area [mAU*s] | Height [mAU] | Area %   |
|--------|---------------|------|-------------|--------------|--------------|----------|
| 1      | 7.943         | MM   | 0.2547      | 3795.40942   | 248.39760    | 100.0000 |

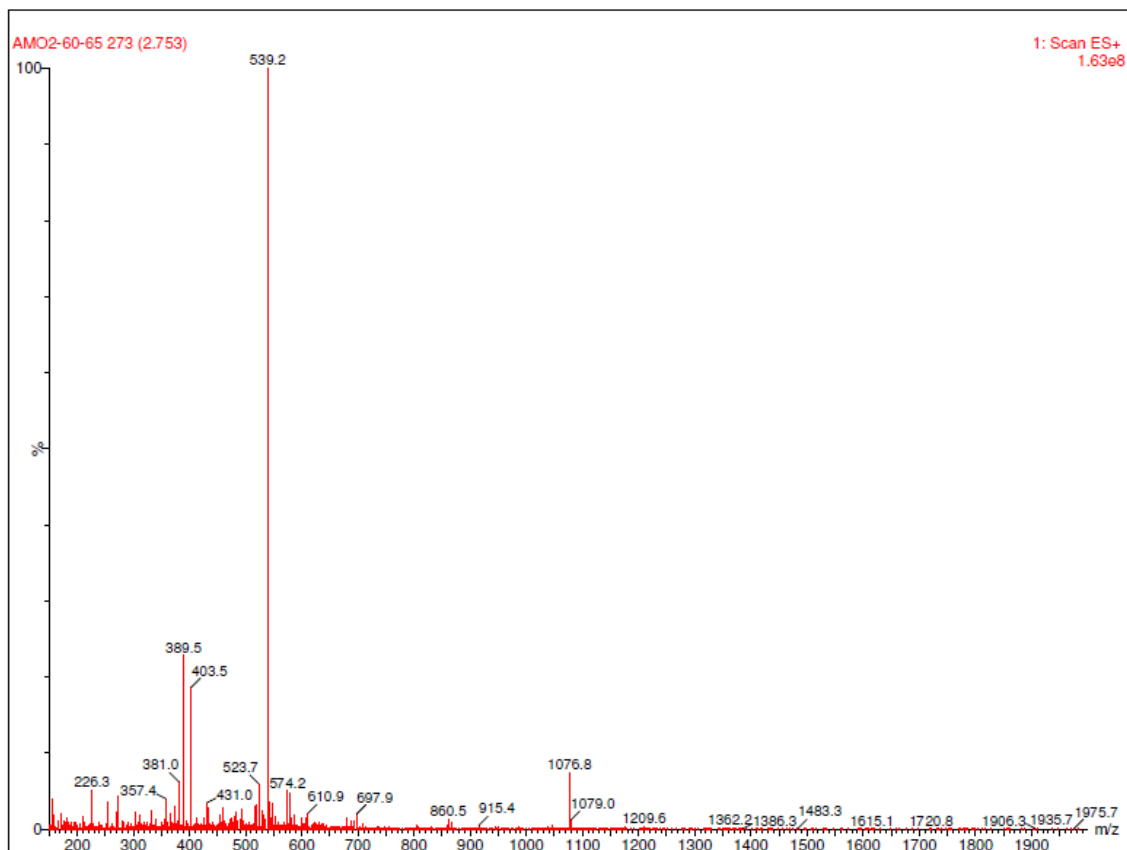

18: AllylGly-K-G-P-AllylGly-Tyr(OBn)

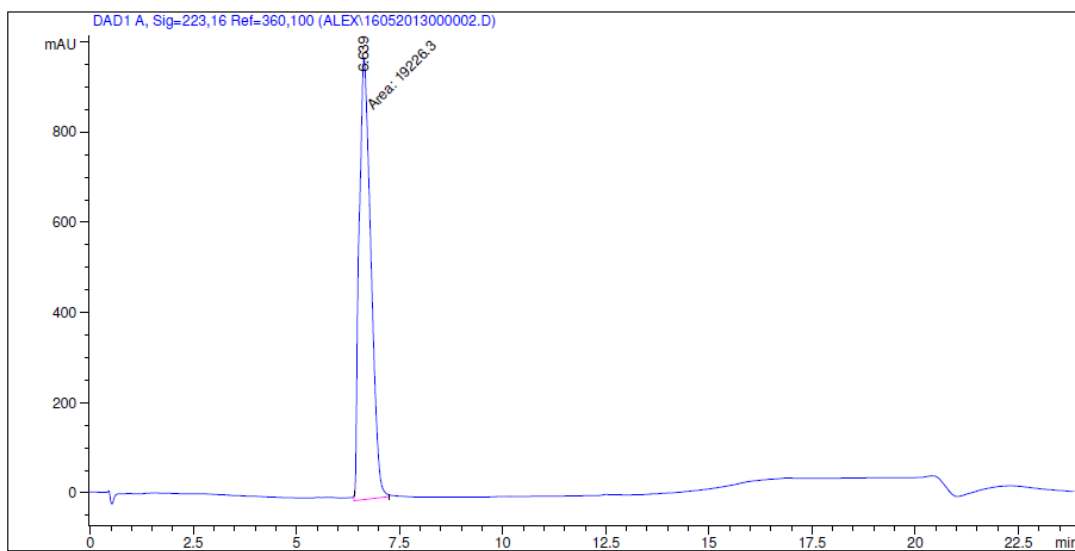

=====  
 Area Percent Report  
 =====

Sorted By : Signal  
 Multiplier : 1.0000  
 Dilution : 1.0000  
 Use Multiplier & Dilution Factor with ISTDs

Signal 1: DAD1 A, Sig=223,16 Ref=360,100

| Peak # | RetTime [min] | Type | Width [min] | Area [mAU*s] | Height [mAU] | Area %   |
|--------|---------------|------|-------------|--------------|--------------|----------|
| 1      | 6.639         | MM   | 0.3276      | 1.92263e4    | 977.99957    | 100.0000 |

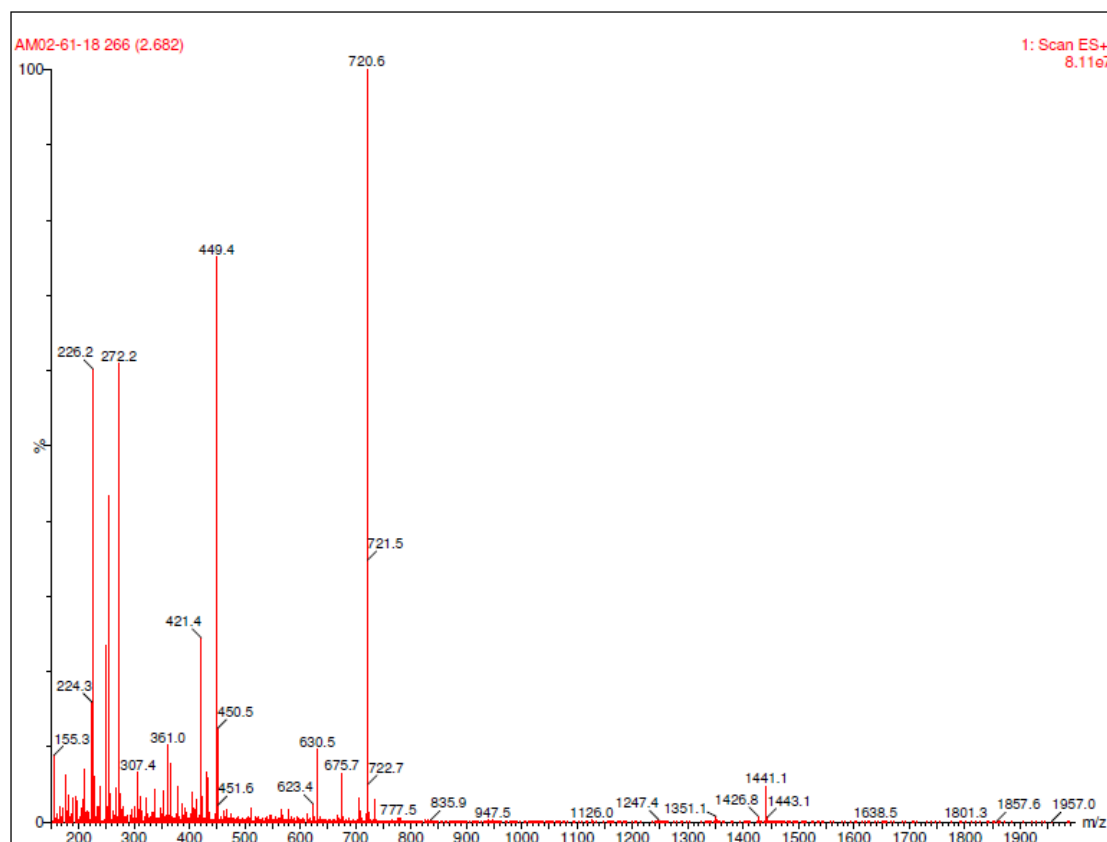

19: Pyr-R-P-R-L-S-AllylGly-K-G-P-AllylGly-Tyr(OBn)

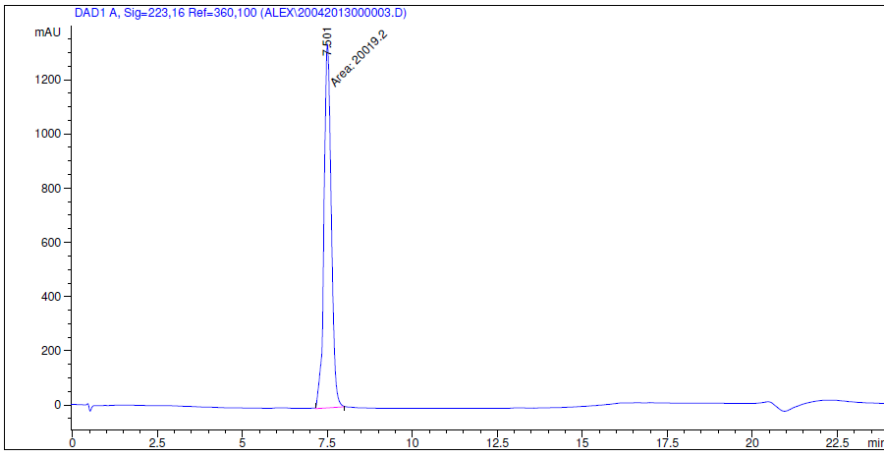

=====  
Area Percent Report  
=====

Sorted By : Signal  
Multiplier : 1.0000  
Dilution : 1.0000  
Use Multiplier & Dilution Factor with ISTDs

Signal 1: DAD1 A, Sig=223,16 Ref=360,100

| Peak # | RetTime [min] | Type | Width [min] | Area [mAU*s] | Height [mAU] | Area %   |
|--------|---------------|------|-------------|--------------|--------------|----------|
| 1      | 7.501         | MM   | 0.2485      | 2.00192e4    | 1342.45593   | 100.0000 |

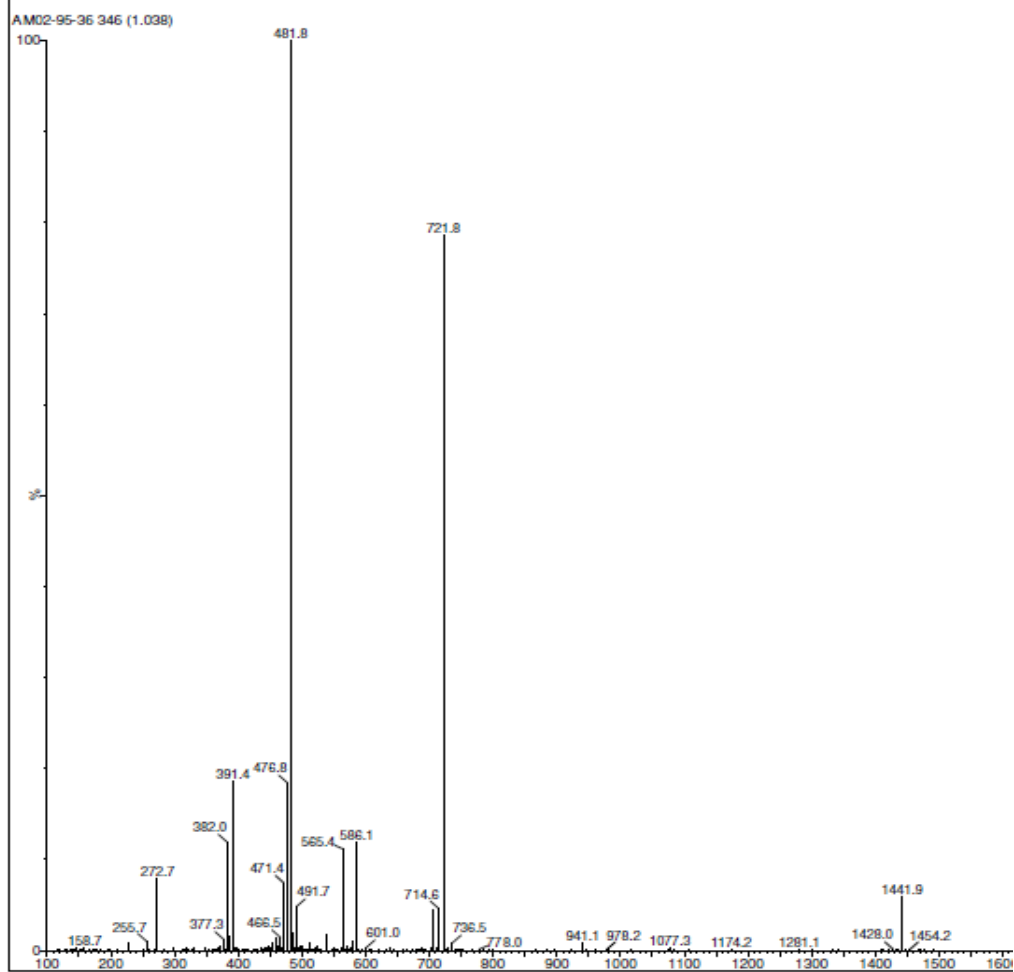

20: Ac-R-P-R-L-S-AllylGly-K-G-P-AllylGly-Tyr(OBn)

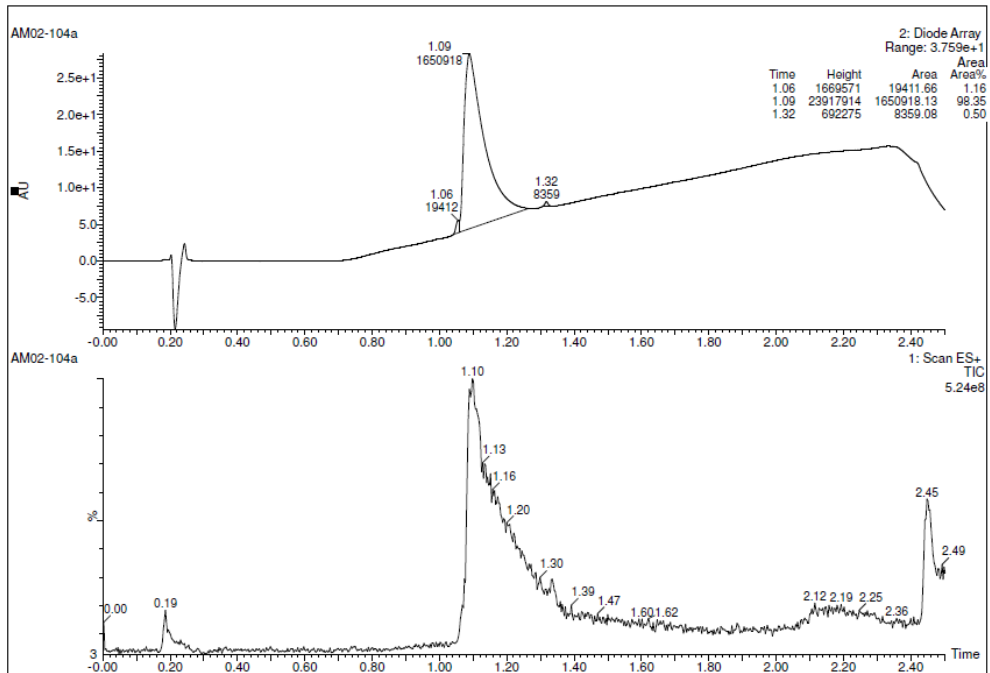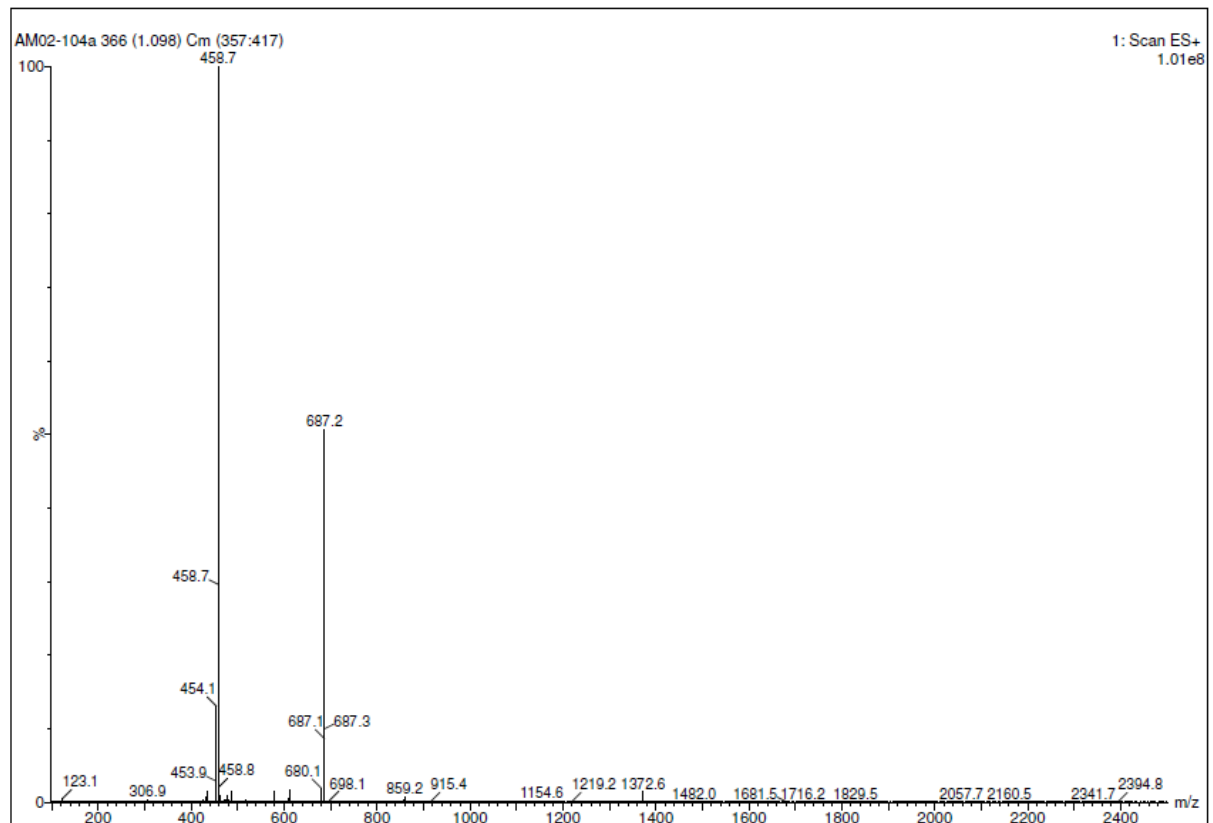

21: Des-amino-R-P-R-L-S-AllyIGly-K-G-P-AllyIGly-Tyr(OBn)

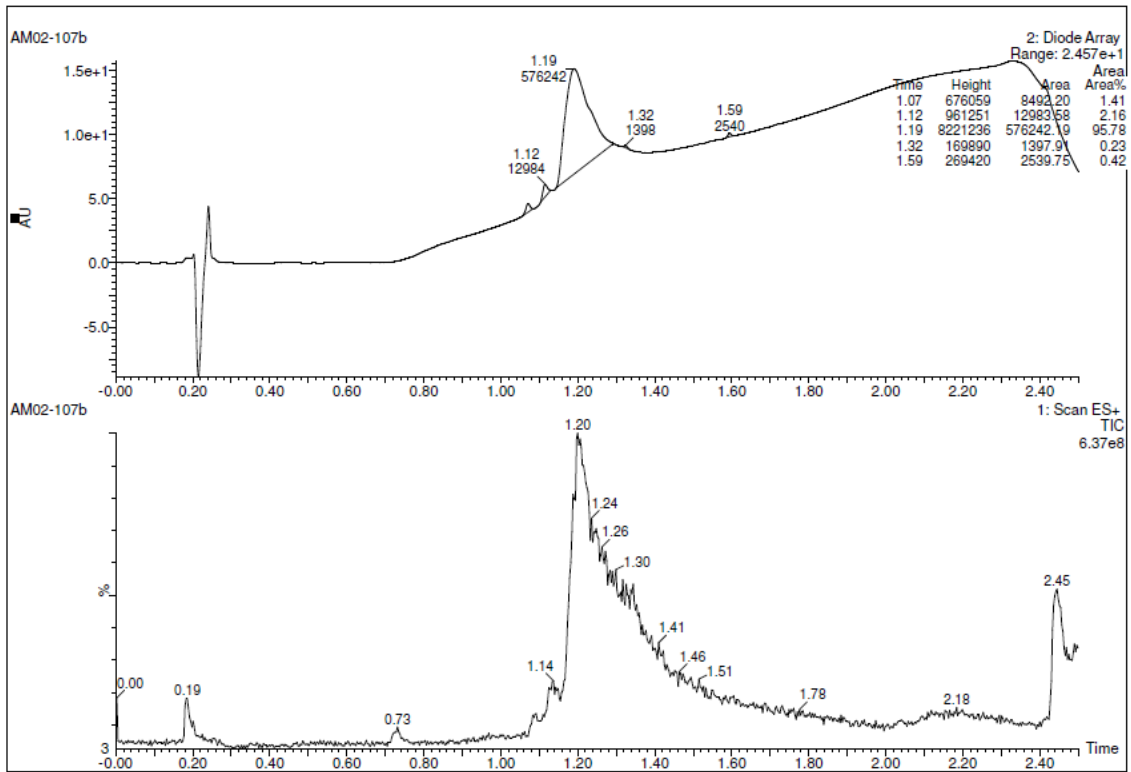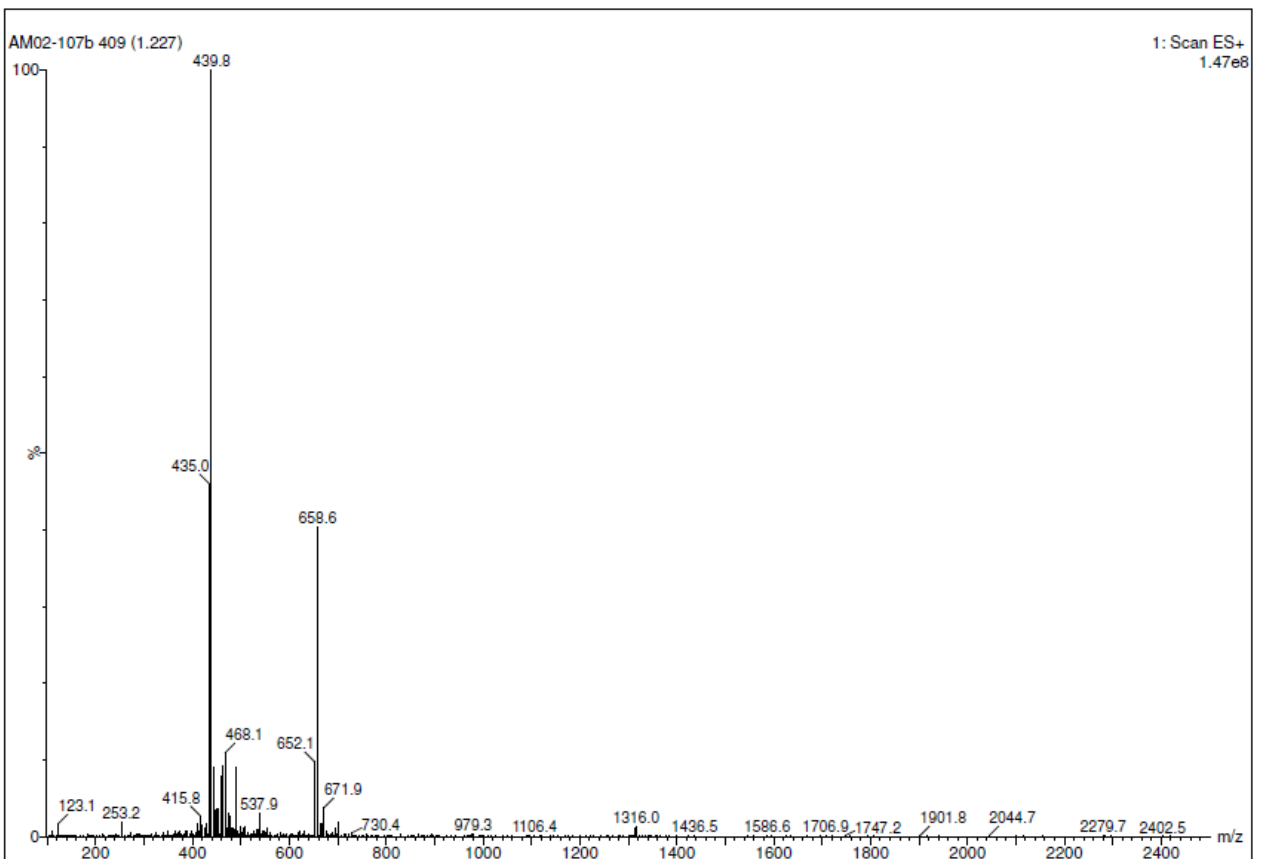

Supplement: c6ob02247b1.pdf [file c6ob02247b1.pdf]
